# Bioinformatic analysis of endogenous and exogenous small RNAs on lipoproteins

\*Ryan M. Allen<sup>1</sup>, \*Shilin Zhao<sup>2</sup>, Marisol A. Ramirez Solano<sup>1</sup>, Danielle L. Michell<sup>1</sup>, Yuhuan Wang<sup>3</sup>, Yu Shyr<sup>2</sup>, Praveen Sethupathy<sup>4</sup>, MacRae F. Linton<sup>1</sup>, Gregory A. Graf<sup>3</sup>, #Quanhu Sheng<sup>2</sup> #Kasey C. Vickers<sup>1</sup>

<sup>1</sup>Department of Medicine, Vanderbilt Univ. Medical Center, Nashville, TN. 37232 USA

<sup>2</sup>Department of Biostatistics, Vanderbilt Univ. Medical Center, Nashville, TN. 37232 USA

<sup>3</sup>Department of Pharmaceutical Sciences, University of Kentucky. Lexington, KY. 40536 USA

<sup>4</sup>Department of Biomedical Sciences, College of Veterinary Medicine, Cornell University, Ithaca, NY. 14853 USA

\*Co-first authors

#Co-corresponding authors

## CORRESPONDING AUTHOR:

Kasey C. Vickers, PhD  
2220 Pierce Ave.  
312 Preston Research Building  
Nashville, TN 37232  
Ph: 1-615.936.2989  
Fax: 1-615.936.1872  
kasey.c.vickers@Vanderbilt.edu

## ABBREVIATIONS:

exRNA, extracellular RNAs; HDL, high-density lipoproteins; HMB, human microbiome project; lncRNA, long non-coding RNA; lncDR, lncRNA-derived sRNA; LDL, low-density lipoproteins; miscRNA, miscellaneous sRNA; ncRNA, non-coding RNA; NIH, National Institutes of Health; nts, nucleotides; osRNA, other sRNA; PM, perfect match; rDR, rRNA-derived sRNA, RPM, Reads Per Million total reads; rRNA, ribosomal RNA; sRNA, small RNAs; snDR, snRNA-derived sRNA; snoDR, snoRNA-derived sRNA; snoRNA, small nucleolar RNA; snRNA, small nuclear RNA; SR-BI, scavenger receptor BI; sRNA-seq, small RNA sequencing, tDR, tRNA-derived sRNA; tRNA, transfer RNA; yDR, Y RNA-derived sRNA; 3' UTR, 3' untranslated regions.

45 **Abstract**

46 To comprehensively study extracellular small RNAs (sRNA) by sequencing (sRNA-seq), we developed  
47 a novel pipeline to overcome current limitations in analysis entitled, “*Tools for Integrative Genome*  
48 *analysis of Extracellular sRNAs (TIGER)*”. To demonstrate the power of this tool, sRNA-seq was  
49 performed on mouse lipoproteins, bile, urine, and liver samples. A key advance for the TIGER pipeline  
50 is the ability to analyze both host and non-host sRNAs at genomic, parent RNA, and individual fragment  
51 levels. TIGER was able to identify approximately 60% of sRNAs on lipoproteins, and >85% of sRNAs in  
52 liver, bile, and urine, a significant advance compared to existing software. Results suggest that the  
53 majority of sRNAs on lipoproteins are non-host sRNAs derived from bacterial sources in the  
54 microbiome and environment, specifically rRNA-derived sRNAs from Proteobacteria. Collectively,  
55 TIGER facilitated novel discoveries of lipoprotein and biofluid sRNAs and has tremendous applicability  
56 for the field of extracellular RNA.

57

58

59

60

61

62

63

64

65

## 66 Introduction

67 High-throughput small RNA sequencing (sRNA-seq) is a state-of-the-art method for profiling sRNAs,  
68 and is widely-used across many disciplines. Although many software are currently available for sRNA-  
69 seq data analysis, most fail to meet the present demands for the study of host and non-host sRNAs  
70 across diverse RNA classes. This is particularly important for the investigation of extracellular RNA  
71 (exRNA), which have recently been found to be heterogeneous pools of host (e.g. human) and non-  
72 host (e.g. bacteria) sRNAs<sup>1-3</sup>. Furthermore, individual sRNA classes harbor distinct features, e.g.  
73 miRNA 3' non-templated additions (NTA)<sup>4-6</sup>, and these features each require unique strategies for  
74 alignments and quantification. A key objective for data analysis is to account for all reads in the sRNA-  
75 seq dataset, and current approaches to sRNA profiling now require sophisticated analysis strategies.  
76 Therefore, we developed a novel data analysis pipeline entitled, "*Tools for Integrative Genome analysis*  
77 *of Extracellular sRNAs (TIGER)*." This pipeline integrated host and non-host sRNA analysis through  
78 both genome and database alignments, and greatly improved the ability to account for a larger number  
79 of reads in sRNA-seq datasets. The TIGER pipeline was designed for the study of lipoprotein sRNAs;  
80 however, it has great applicability to all sRNA-seq studies.

81 The most extensively studied class of sRNAs is microRNAs (miRNA)<sup>7</sup> and many sRNA-seq analysis  
82 tools are limited to only miRNA quantification<sup>8</sup>. In addition to miRNAs, many other classes of sRNAs are  
83 present in sRNA-seq datasets<sup>9</sup>. These include sRNAs derived from parent transfer RNAs (tRNA),  
84 ribosomal RNAs (rRNA), small nucleolar RNAs (snoRNA), small nuclear RNAs (snRNA), long non-  
85 coding RNAs (lncRNA), Y RNAs, and several other miscellaneous non-coding RNAs<sup>10, 11</sup>. For  
86 consistency in nomenclature, here, we will refer to these novel sRNA classes as tRNA-derived sRNAs  
87 (tDR), rRNA-derived sRNAs (rDR), lncRNA-derived sRNAs (lncDR), snRNA-derived sRNAs (snDR),  
88 snoRNA-derived sRNAs (snoDR), Y RNA-derived sRNAs (yDR) and other miscellaneous sRNAs  
89 (miscRNA). Outside of miRNAs and tDRs, the biological function(s) of these other endogenous sRNAs  
90 are unknown<sup>11, 12</sup>. Nevertheless, similar to miRNAs, many of these endogenous sRNAs are present in

91 biological fluids and hold great potential as disease biomarkers or intercellular communication signals;  
92 however, tools for their analysis in sRNA-seq datasets are very limited<sup>13, 14</sup>.

93 In plasma and other biofluids, exRNAs are carried by extracellular vesicles (EV), lipoproteins, and  
94 ribonucleoproteins, which protect exRNAs against RNase-mediated degradation<sup>15, 16</sup>. Previously, we  
95 reported that lipoproteins - low-density lipoproteins (LDL) and high-density lipoproteins (HDL) -  
96 transport miRNAs in plasma, and lipoprotein miRNA signatures are distinct from exosomes<sup>17</sup>. Using  
97 real-time PCR-based TaqMan arrays, we further identified HDL-miRNAs that were significantly altered  
98 in hypercholesterolemia and atherosclerosis<sup>17</sup>. Currently, it is unknown if lipoproteins transport other  
99 sRNAs in addition to miRNAs. In a previous study, we reported that HDL transfer miRNAs to recipient  
100 cells and this process is regulated by HDL's receptor, scavenger receptor BI (SR-BI), in hepatocytes<sup>17</sup>.  
101 SR-BI is a bidirectional transporter of cholesterol and a critical factor in reverse cholesterol transport  
102 pathway in which HDL returns excess cholesterol to the liver for excretion to bile. Currently, it is  
103 unknown if miRNAs, and potentially other sRNAs, on lipoproteins follow cholesterol and are transported  
104 to the liver for secretion to bile. Likewise, as SR-BI can export cholesterol to HDL, it is unclear whether  
105 SR-BI directly influences sRNAs on lipoproteins or in biofluids.

106 To demonstrate the power of the TIGER pipeline, we present results from our comprehensive  
107 analysis of lipoprotein sRNAs by high-throughput sRNA-seq. Using TIGER, we found that lipoproteins  
108 transport a wide-variety of host and non-host sRNAs, most notably, HDL and APOB particles transport  
109 non-host bacterial tDRs and rDRs. TIGER analysis was also used to demonstrate that lipoprotein sRNA  
110 signatures were distinct from liver, bile, and urine for host sRNAs. Moreover, TIGER analysis was used  
111 to determine the role of SR-BI in the regulation of exRNAs on lipoproteins and in biofluids. At the parent  
112 RNA level, SR-BI-deficiency had minimal impact on sRNA levels; however, by organizing sRNAs at the  
113 individual fragment level, we found that loss of SR-BI in mice resulted in significant changes to specific  
114 sRNA classes in different sample types. TIGER was designed to overcome many of the barriers and

115 challenges in sRNA-seq analysis, particularly for exRNA, and its application uncovered many novel  
116 observations for sRNAs on lipoproteins and in liver and biological fluids.

117

## 118 **Results**

### 119 **Lipoproteins transport distinct miRNA signatures.**

120 The full-compendium of exRNAs on lipoproteins has not been investigated and an unbiased approach  
121 to identifying and quantifying sRNAs on lipoproteins was warranted. To address this gap, high-  
122 throughput sRNA-seq was used to profile sRNAs on HDL and apoB-containing particles (APOB)  
123 purified from mouse plasma by size-exclusion chromatography (**Figure 1-Figure Supplement 1A-C**),  
124 and lipoprotein profiles were compared to mouse liver, bile, and urine. For host sRNAs, the TIGER  
125 pipeline prioritized annotated sRNAs in ranking order; miRNAs, tDRs, rDRs, snDRs, snoDRs, yDRs,  
126 lncDRs, miscellaneous sRNAs (miscRNA), and unannotated host genome sRNAs (**Figure 1**). sRNAs  
127 can be normalized by reads per million total reads (RPM) or reads per million class reads, e.g. total  
128 miRNA reads (RPM miR). To compare miRNA content between groups, real-time PCR was performed  
129 for 9 miRNAs across all samples and correlations between PCR results and sRNA-seq results based  
130 on each normalization method were compared by rank correlations. For these data, normalization by  
131 RPM ( $R^2=0.45$ ) showed a higher correlation between PCR and sequencing results than RPM miR  
132 ( $R^2=0.17$ ) (**Figure 2A, Figure 2 – Source Data 1**) Lipoproteins, specifically APOB particles, were found  
133 to have less miRNA content, as reported by total miRNA counts (RPM), than livers which had the  
134 largest fraction of miRNAs per total reads (RPM) (**Figure 2B**). To compare miRNA signatures across  
135 sample types, Principal Coordinate Analysis (PCoA) was used, and lipoprotein and biofluid clusters  
136 were distinct from livers (**Figure 2C**). To quantify differences in the homogeneity of the miRNA profile  
137 multivariable distributions (miRNAs) within each groups, PERMANOVA tests were performed, and  
138 miRNA profiles of lipoproteins (HDL and APOB) and biofluids (bile and urine) were significantly different

139 than livers (wild-type, WT, mice) – APOB (F=9.57, p=0.001), HDL (F=7.11, p=0.001), bile (F=5.56,  
140 p=0.001), and urine (F=8.42, p=0.001) (**Figure 2 – Source Data 2**). Next, beta-dispersion tests were  
141 used to determine that lipoprotein (high-dispersions) and biofluid (high-dispersions) samples were  
142 significantly (ANOVA P<0.05) more dispersed (less consistent) than livers (low-dispersion) – APOB  
143 (F=31.03, p<0.0001), HDL (F=23.20, p<0.0001), bile (F=17.09, p<0.0001), and urine (F=15.47,  
144 p<0.0001) (**Figure 2C**). To further compare miRNA signatures between groups, high-end analyses  
145 were performed using hierarchical clustering and correlations of group means. Lipoprotein profiles  
146 clustered separately from liver and biofluids, and lipoproteins displayed high correlations between HDL  
147 and APOB groups and modest correlations to liver, bile, and urine groups (**Figure 2D**). These results  
148 suggest that HDL and APOB transport unique miRNA signatures that are distinct from liver with  
149 decreased homogeneity and increased dispersion.

150 Due to imprecise cleavage of miRNAs from precursor miRNA hairpins<sup>18-20</sup>, one miRNA locus can  
151 produce multiple isoforms, termed isomiRs, which can differ by one or two nts at the 5' start position.  
152 Consequently, the canonical miRNA “seed” sequence is altered, potentially conferring recognition of  
153 different mRNA targets<sup>19-21</sup>. Therefore, it is important that miRNA analysis includes quantification of  
154 isomiRs and all samples in our study contained 5' isomiRs, the largest fraction was found on HDL  
155 (8.42%) followed by urine (7.2%), APOB (6.53%), bile (4.54%), and liver (4.34%) (**Figure 2-Figure**  
156 **Supplement 1A,B**). In addition, we found specific examples of miRNAs with different 5' terminal start  
157 positions than their reported canonical forms, e.g. miR-142-5p (-2), miR-133a-3p (+1) and miR-192-5p  
158 (+1), and these patterns were consistent across all sample types (**Figure 2E**). Most interestingly, we  
159 found evidence that miRNAs may be partitioned to cellular and extracellular pools by their isomiR  
160 forms, as lipoproteins and biofluids contained significantly more 5' (-1) isomiRs of miR-101a-3p than  
161 liver samples (**Figure 2E**). Mature miRNAs also harbor extensive variability on their 3' terminal ends  
162 due to imprecise processing and NTAs, e.g. extra non-genomic 3' nts added by cytoplasmic  
163 nucleotidyltransferases<sup>6, 22</sup>. A substantial fraction of miRNAs (17-32%) across all sample types were

164 modified with NTAs (**Figure 2–Figure Supplement 1C**). As a percentage of total miRNAs, APOB  
165 particles contained significantly more miRNAs harboring non-templated additions (NTA) than liver  
166 samples (**Figure 2-Figure Supplement 1B,C**). A previous study proposed that poly-uridylation (NTA-  
167 U) was increased on extracellular miRNAs (released in exosomes) and miRNA poly-adenylation (NTA-  
168 A) was associated with cellular retention<sup>23</sup>. To determine if lipoproteins and/or biofluids are similarly  
169 enriched for poly-uridylation, NTA patterns were compared between groups, and similar to exosomes,  
170 HDL and APOB samples were indeed observed to be significantly enriched with NTA-U compared to  
171 liver samples which were enriched with NTA-A (**Figure 2F**). Intriguingly, extracellular miRNAs in bile  
172 and urine from WT mice were not enriched for either NTA; however, in urine, loss of SR-BI (KO mice)  
173 was found to significantly increase the NTA-U/A ratio (**Figure 2F**). Collectively, these results  
174 demonstrate that miRNAs on lipoproteins are distinct for many features from hepatic miRNAs, including  
175 5' isomiRs and 3' NTAs.

176

### 177 **Lipoproteins transport many classes of host sRNAs**

178 Most, if not all, non-coding RNAs are processed to smaller fragments creating an enormously diverse  
179 pool of sRNAs in cells and extracellular fluids<sup>12</sup>. To determine if lipoproteins also transport non-miRNA  
180 sRNAs and to compare annotated host sRNAs across sample types, reads were aligned to the host  
181 (mouse) genome, as well as to mature transcripts for specific RNA classes with genes containing  
182 introns, e.g tRNAs and rRNAs<sup>24</sup>. For liver samples, the most abundant class of sRNAs was rDRs, which  
183 were predominantly 42-45 nts in length (**Figures 3A,B**). rDRs were also present on HDL and APOB  
184 particles; however, their lengths were variable (**Figures 3A,C,D**). We also detected snoDRs (57-64 nts  
185 in length) in livers; however, snoDRs were largely absent from lipoproteins and biofluids, suggesting  
186 that the liver and other tissues may not export this class of sRNAs to lipoproteins or into bile or urine  
187 (**Figures 3A-F**). Both lipoproteins and biofluids contained tDRs 28-36 nts in length which suggests that  
188 these sRNA are likely tRNA-derived halves (tRHs), a sub-class of tDRs approximately 31-35 nts in

189 length (**Figures 3A,C,D**)<sup>42, 47</sup>. Most tDRs on lipoproteins and in biofluids aligned to the 5' halves of  
190 parent tRNAs, particularly amino acid anticodons for glutamate (GluCTC), glycine (GlyGCC), aspartate  
191 (AspGTC), and valine (ValCAC) (**Figure 4A, Figure 4-Figure Supplement 1**). Strikingly, 68.9% of tDR  
192 reads on HDL and APOB particles from WT mice aligned to the parent tRNA GluCTC (**Figure 4A,**  
193 **Figure 4-Figure Supplements 2A,B**). A key feature of the TIGER pipeline is the ability to analyze  
194 sRNAs based on their parent RNAs or individually as fragments. At the parent level for tDR signatures,  
195 all groups overlapped; however, at the fragment level, tDR signatures for lipoproteins, bile, and urine  
196 were found to be clearly delineated from livers (**Figures 4B,C**). These results were supported by  
197 PERMANOVA analysis which indicated that lipoprotein and biofluids were significantly distinct from liver  
198 based on tDR fragments: APOB (F=5.32, p=0.001), HDL (F=2.94, p=0.014), bile (F=10.22, p=0.001),  
199 and urine (F=7.08, p=0.001) (**Figure 2-Source Data 2**). Hierarchical clustering and correlation analyses  
200 further support that the profile of individual fragments, rather than parent tRNAs, define tDR expression  
201 across sample types (**Figure 4-Figure Supplements 3A,B**). Strikingly, this pattern where groups are  
202 defined by organizing sRNAs based on individual fragments instead of parent RNAs was consistent for  
203 other host sRNAs, including rDRs and snDRs (**Figure 4-Figure Supplements 3C-F,4A-F; Figure 2-**  
204 **Source Data 2**).

205 To validate candidate host sRNAs on lipoproteins and in biofluids identified by sRNA-seq, real-time  
206 PCR using custom locked-nucleic acid (LNA)-based assays (Exiqon) were completed. For tDRs, both  
207 tDR-GluCTC (38 nts in length) and tDR-GlyGCC (32 nts in length) were confirmed to be highly-  
208 abundant on HDL and APOB particles, and were not detected in the negative control (buffer) solution  
209 used to isolate the lipoproteins (**Figure 4D,E**). Furthermore, two novel snDRs and a candidate sRNA  
210 cleaved from a ribozyme (miscRNA) were also detected by PCR on lipoproteins at comparable levels to  
211 a previously reported miRNA on lipoproteins (miR-223-3p) (**Figure 4-Figure Supplements 5A-D**).  
212 Although the general, regional cleavage patterns for specific parent RNAs were consistent for tRNAs  
213 (**Figure 4-Figure Supplement 1**) and snRNAs (**Figure 4-Figure Supplement 6**), and specific



214 candidate sRNAs can be quantified by PCR as single products (based on melting curves), most  
215 individual fragments were variable across samples due to slight differences in length or sequences. To  
216 more clearly illustrate this point, we performed correlations at both the parent RNA and individual  
217 fragment levels within each sRNA class. For tDRs (**Figure 4F**) and other RNA classes (**Figure 4-**  
218 **Figure Supplement 7**), we found high correlation between samples at the parent level and poor  
219 correlation between samples at the fragment level for HDL, APOB, bile, and urine. For liver samples,  
220 high correlation was detected for sRNAs at both the parent and fragment levels (**Figure 4F, Figure 4-**  
221 **Figure Supplement 7**). These results suggest that, although individual fragments define sRNA classes  
222 across groups, further investigation of individual candidate sRNAs (fragments) may be challenging due  
223 to variability across samples.

224

#### 225 **Lipoproteins are enriched in exogenous sRNAs**

226 Reads aligning to non-human transcripts have previously been detected in human plasma samples<sup>1</sup>;  
227 however, it is unknown which carriers transport non-host sRNAs in host circulation. To determine if  
228 lipoproteins carry exogenous bacterial and fungal sRNAs, reads >20 nts in length that failed to map to  
229 the host (mouse) genome were aligned in parallel to A.) Annotated non-host transcripts curated in  
230 GtRNADB (tRNA), SILVA (rRNA), and miRBase (miRNA) databases, and B.) Genomes of bacteria and  
231 fungi of the microbiome (human microbiome, HMB) or environment (ENV) (**Figure 1**). To identify  
232 exogenous miRNAs (xenomiRs), reads were aligned (perfect match only) to non-host mature miRNA  
233 sequences (miRBase.org); however, only a few xenomiRs were detected within our datasets and  
234 overall contributions to each profile were minimal (**Figure 5-Source Data 1**). To determine the levels of  
235 exogenous tDRs on lipoproteins, non-host reads were aligned to parent tRNAs curated in the GtRNADB  
236 library. Both HDL and APOB particles were found to transport a diverse set of exogenous tDRs across  
237 multiple kingdoms, which accounted for approximately 2.5% of sRNAs (total reads) circulating on each  
238 lipoprotein class (**Figure 5A, Figure 5-Source Data 2**). Bacterial tDRs were the most represented

239 taxon, and the most abundant bacterial species were *Pseudomonas fluorescens*, *Pseudomonas*  
240 *aeruginosa*, and *Acinetobacter baumannii* (**Figure 5-Figure Supplements 1A,B**). The parent tRNAs  
241 (based on amino acid anticodons) with the highest normalized read counts were fMetCAT, GluTTC,  
242 AspGTG, and AsnGTT (**Figure 5-Figure Supplement 1C**). In contrast to host tDRs that predominantly  
243 aligned to the 5' halves of parent tRNAs (**Figure 4A, Figure 4-Figure Supplement 1**), positional  
244 coverage analysis demonstrated that bacterial tDRs aligned across the entirety of tRNA transcripts  
245 (**Figure 5B, Figure 5-Figure Supplements 2 and 3**). To identify exogenous rDRs on lipoproteins, non-  
246 host reads were separately aligned to known rRNA transcripts curated in the SILVA database, and  
247 remarkably, non-host rDRs accounted for approximately 25% of total reads in each of the HDL and  
248 APOB datasets (**Figure 5C, Figure 5-Source Data 3**). Although rDRs from every taxonomical kingdom  
249 were present on lipoproteins, bacterial rDRs were the most abundant (**Figure 5C, Figure 5-Figure**  
250 **Supplement 4, Source Data 3**). The overall content of non-host sRNAs on HDL and APOB particles  
251 were similar; however, HDL were found to be enriched for shorter length non-host tDRs and rDRs  
252 compared to APOB particles (**Figures 5D,E**). Collectively, these results suggest that lipoproteins  
253 transport exogenous tDR and rDRs, most of which are likely bacterial in origin.

254       Aligning reads to transcripts in databases is biased in that only known (annotated) RNAs are  
255 queried, and thus, limits the power of discovery in sRNA-seq datasets. To comprehensively analyze  
256 exogenous sRNAs, non-host reads were also aligned to bacterial genomes within the NIH HMB Project  
257 ([hmpdacc.org](http://hmpdacc.org)). The HMB database currently holds 3,055 genomes, many of which are closely related;  
258 therefore, to address potential multi-mapping issues, we collapsed these species into 206  
259 representative genomes that spanned 11 phyla and accounted for every genera within the HMB.  
260 Alignment of non-host reads to HMB genomes identified many bacterial sRNAs on lipoproteins and in  
261 biofluids, reported as summarized genome read counts per million total reads (RPM) (**Figure 6-Figure**  
262 **Supplement 1A-B, Source Data 1**). To perform taxonomical analyses of lipoprotein-associated  
263 bacterial sRNAs, circular tree maps were generated. As shown by concentric rings in the tree maps, the

264 vast majority of both HDL and APOB bacterial reads mapped to the Proteobacteria phylum (green),  
265 followed by the Actinobacteria (blue) and Firmicutes (yellow) phylums (**Figure 6A, Figure 6-Figure**  
266 **Supplement 2A**). Within the Proteobacteria phylum, the majority of reads aligned to the  
267 Gammaproteobacteria class, particularly the orders of Pseudomonadales and Enterobacteriales.  
268 Among individual genera (inner-most circles), counts for the genus *Pseudomonas* (Proteobacteria  
269 phylum) were consistently the high, as were *Micrococcus* (Actinobacteria phylum) (**Figure 6A, Figure**  
270 **6-Figure Supplement 2A**).

271 Most interestingly, many reads that aligned to bacterial rRNA transcripts failed to align to the HMB  
272 genomes, thus suggesting that some sRNAs may originate from bacteria not presently curated in the  
273 HMB database. Using BLASTn (NCBI), many highly abundant reads were perfect matches to bacterial  
274 genomes of environmental bacterial species of soil and water, but could be associated with  
275 opportunistic infections. Therefore, to increase our non-host coverage, 167 additional bacterial  
276 genomes representing non-redundant genera of 8 taxonomical phyla were added, termed here as  
277 environmental bacteria (ENV). The ENV species with the highest normalized genome counts for WT  
278 lipoproteins were *Pseudomonas fluorescens*, *Pseudomonas putida*, *Propionibacterium acnes*, and  
279 *Stenotrophomonas maltophilia* (**Figure 6-Figure Supplements 1C,D, and 2B,C, Source Data 2**).  
280 Although many non-host reads aligned to both HMB and ENV genomes, a majority of all non-host  
281 bacterial reads could be assigned exclusively to only one database, suggesting a complex origin for  
282 bacterial sRNAs on circulating lipoproteins (**Figure 6-Figure Supplements 3**). In addition to bacterial  
283 sRNAs, we also identified fungal sRNAs on lipoproteins, and the highest normalized genome counts for  
284 fungal species on WT HDL were *Fusarium oxysporum*, *Histoplasma capsulatum*, *Cryptococcus*  
285 *neoformans* (**Figure 6-Figure Supplements 4A,B, Source Data 3**).

286 To assess bacterial sRNA profiles across samples, non-host sRNAs (HMB and ENV) on  
287 lipoproteins were correlated between samples. For both databases, we identified high correlations  
288 between samples at the genome level and low correlations at the fragment level (**Figures 6B,C**). These

289 data suggest that similar bacteria are contributing sRNAs to circulating lipoproteins across all mice.  
290 Nevertheless, these bacteria may contribute different sRNAs (sequences) to HDL and APOB particles  
291 in different mice or the processing of bacterial sRNAs before and/or during HDL and APOB trafficking is  
292 differentially regulated. A key difference between HDL and APOB bacterial sRNAs was length, as HDL  
293 were enriched for shorter sRNAs than APOB particles; this pattern was evident for both HMB and ENV  
294 sRNAs (**Figures 6D,E**). A similar trend was observed for reads mapping to fungal genomes (**Figure 6-  
295 Figure Supplement 5**). To determine if HDL and APOB particles transport different exogenous (non-  
296 host) sRNA signatures, PCoA and PERMANOVA analyses were completed. At the genome level, the  
297 HDL and APOB particles were indistinguishable for HMB and ENV bacteria (**Figure 6-Figure  
298 Supplement 6A,B**); however, HDL and APOB profiles clustered separately at the fragment level and  
299 HDL and APOB profiles were distinct ( $F=1.7$ ,  $p=0.048$ ) for ENV bacterial sRNAs by PERMANOVA  
300 (**Figure 6-Figure Supplement 6C,D, Source Data 4**).

301 The lack of strong correlation at the fragment level for non-host sRNAs is likely due to differences in  
302 read lengths and sequences (e.g. terminal nts) for similar reads due to imprecise processing of parent  
303 RNAs, and thus variable read counts across samples. These observations present unique challenges  
304 to study individual sRNAs for biological function; however, many candidate sRNAs do exist within the  
305 very large pool of non-host reads. Using real-time PCR, we quantify candidate bacterial sRNAs on  
306 lipoproteins, and confirmed that HDL and APOB particles transport a 22 nt rDR (5'-  
307 AGAGAACUCGGGUGAAGGAACU-3') likely from bacteria of the Proteobacteria phylum (**Figure 6F,  
308 Figure 6-Figure Supplement 7**). Likewise, HDL and APOB were also found to transport another rDR  
309 of the Proteobacteria phylum, likely from the order of Burkholderiales (33 nts, 5'-  
310 GACCAGGACGUUGAUAGGCUGGGUGUGGAAGUG-3') (**Figure 6G, Figure 6-Figure Supplement  
311 8**). In addition to bacterial sRNAs, real-time PCR was also used to confirm that lipoproteins transport a  
312 fungal rDR from the *Verticillium* genus (21 nts 5'-UGGGUGUGACGGGGAAGCAGG-3') (**Figure 6-  
313 Figure Supplement 9**). These results suggest that HDL and APOB transport non-host sRNAs derived

314 from bacterial and fungal sources in the microbiome and environment. Bile and urine samples also  
315 contained non-host sRNAs, albeit a lesser fraction of total reads. Collectively, these observations  
316 support the need to include non-host sRNAs in the analysis of sRNA-seq data.

317

### 318 **Lipoproteins are defined by their most abundant sRNAs**

319 To determine which RNA class and species contribute to the most abundant sRNAs in each sample  
320 type, the top 100 ranked reads for each sample were filtered and redundant reads were removed for  
321 each group. For liver and bile samples, the top ranked reads were predominantly host sRNAs (**Figure**  
322 **7A,B**). On the contrary, the top most abundant reads on lipoproteins were comprised of both host and  
323 non-host sRNAs (**Figures 7C,D**). The top ranked reads in urine samples were found to be largely host  
324 sRNAs (e.g. tDRs); however, many links to exogenous bacterial sRNAs were identified (**Figure 7E**).  
325 Although our host and non-host analyses were thorough, many of the top ranked sequences remained  
326 unidentified. Therefore, we sought to further analyze sRNA profiles using a class-independent strategy,  
327 in which we focused on only the most abundant reads for each group. To assess the similarity of  
328 profiles between groups for the top ranked sRNAs, hierarchical clustering and correlations were  
329 performed, and lipoproteins displayed modest correlations with other groups and clustered separately  
330 from livers, bile, and urine (**Figure 7-Figure Supplement 1**). These observations were confirmed by  
331 PCoA, as lipoprotein samples overlapped and clustered together, separately from bile, urine and liver  
332 samples (**Figure 7F**). PERMANOVA analysis found that every group was significantly distinct from  
333 each other based on the most abundant sRNAs (**Figure 7-Source Data 1**). These results suggest that  
334 each sample type can be defined by their most abundant sRNAs independent of parent RNA class or  
335 contributing host or non-host species which is highly appropriate for the study of heterogeneous pools  
336 of exRNAs.

337

### 338 **Advances in sRNA-seq analysis.**

339 To compare the TIGER pipeline to other sRNA-seq analysis software, APOB, HDL, and liver samples  
340 from WT mice were analyzed by Chimira<sup>8</sup>, Oasis<sup>14</sup>, ExceRpt<sup>25</sup>, and miRge<sup>13</sup> software (**Figure 8-Source**  
341 **Data 1**). Although the pipelines are designed for different outputs, each can quantify host miRNAs for  
342 which we used to compare analyses, and we found that all the pipelines were comparable in their ability  
343 to quantify host canonical miRNAs for different sample types and the pipelines were highly correlated  
344 for miRNAs (**Figure 8-Figure Supplement 1A,B**). Most available software for sRNA-seq data analysis  
345 are restricted to miRNAs or endogenous (host) sRNAs, including Chimira, Oasis, and miRge (**Figure 8-**  
346 **Source Data 1**). This approach may be suitable for liver samples (red circles), as demonstrated by  
347 ternary plots, but HDL (blue circles) and APOB (green circles) samples remain largely unexplained  
348 (**Figure 8A**). Incorporation of both endogenous and exogenous sRNAs, a key feature of the TIGER  
349 pipeline, is essential to studying lipoprotein sRNAs as this strategy accounts for substantially more  
350 reads in the datasets, as depicted by the left shifts of blue and green circles in the ternary plots (**Figure**  
351 **8B, Figure 8-Source Data 2**). A key metric for comparing pipelines is the amount of (useable)  
352 information extracted from the data by the software, i.e. the percent of assigned quality reads.  
353 Remarkably, the TIGER pipeline accounted for 87.95% bile, 87.9% of liver, 85.3% urine, 71.5% HDL,  
354 and 62.2% APOB reads in WT mice (**Figure 8C, Figure 8-Source Data 3**). In comparison to other  
355 pipelines, the TIGER pipeline accounted for significantly more reads in lipoprotein datasets, and  
356 significantly more reads than Chimira, Oasis, and ExceRpt for liver datasets which are largely host  
357 sRNAs (**Figures 8C,D**). After the TIGER pipeline performs the non-host read analyses, the top ranked  
358 most abundant sequences of the unexplained reads that remain were searched using BLASTn (**Figure**  
359 **1**). Collectively, the TIGER pipeline provides an opportunity to analyze sRNA-seq with increased depth  
360 and detail which is particularly suited for analysis of exRNA and sRNAs on lipoproteins.

361

### 362 **SR-BI Regulation of Lipoprotein sRNAs**

363 SR-BI is highly-expressed in the liver and plays a fundamental role in reverse cholesterol transport  
364 mediating hepatic uptake of HDL-cholesteryl esters and biliary cholesterol secretion<sup>26-28</sup>. Loss-of-  
365 function variants in human *SCARB1* (SR-BI) were associated with increased in circulating HDL-C  
366 levels<sup>29</sup>. Likewise, *Scarb1* mutations in mice also resulted in increased HDL-C levels<sup>30</sup>. We have  
367 previously reported that HDL-delivery of miRNAs to hepatocytes *in vitro* requires SR-BI<sup>17</sup>. Based on  
368 these observations, we hypothesized that SR-BI may regulate sRNA levels on lipoproteins as well as  
369 miRNAs in liver and bile. To quantify the impact of SRBI-deficiency on exRNAs *in vivo*, host sRNAs  
370 were compared at both the parent and fragment levels. For miRNAs, loss of SR-BI in mice did not alter  
371 miRNA content in liver, urine, bile, or APOB particles at the parent level, and only one miRNA (mmu-  
372 miR-143-3p, 0.199-fold, adjp= 0.00042) was significantly altered in SR-BI KO mice compared to WT  
373 mice (**Figure 9A, Figure 9-Source Data 1**). We also identified a limited number of significantly altered  
374 non-miRNA host sRNAs at the parent level in SR-BI KO mice compared to WT mice (**Figure 9A,**  
375 **Figure 9-Figure Supplements 1, Figure 9-Source Data 1**). SR-BI may regulate urinary miRNA NTAs  
376 as SR-BI KO mice were found to have a significant increase in urinary miRNA NTAs ( $p < 0.001$ )  
377 compared to WT mice (**Figure 2-Figure Supplement 1C**). Moreover, we found a significant ( $p = 0.0021$ )  
378 change in NTA-A/U ratios in urine from SR-BI KO mice compared to WT mice, as urine samples from  
379 WT mice were enriched for poly-adenylated miRNAs (NTA-A) and samples from SRBI KO mice were  
380 enriched for poly-uridylated miRNAs (NTA-U) (**Figure 2F**).

381 The impact of SR-BI-deficiency on lipoprotein sRNAs may not be evident by grouping individual  
382 sRNAs by their likely parent RNAs and differential expression analyses of individual fragments for each  
383 RNA class may be necessary, as the expression of many individual fragments were found to be  
384 significantly altered in SR-BI KO mice compared to WT mice and distinct patterns were detected  
385 (**Figure 9**). For example, SR-BI-deficiency resulted in a significant decrease to 21 individual miRNA  
386 sequences (**Figure 9, Figure 9-Source Data 2**). Conversely, we found 57 snDR and 8 rDR fragments  
387 that were significantly increased on HDL (**Figure 9-Source Data 2**). In livers from SR-BI KO mice, we



388 found 14 snDRs and 16 rDRs that were significantly increased at the fragment level, although these  
389 were not identical sequences to fragments found to be decreased on HDL for these classes (**Figure 9,**  
390 **Figure 9-Source Data 2**). These results suggest that SR-BI may play a limited role in regulating sRNAs  
391 circulating on HDL and in livers. Nevertheless, these results strongly support the need to analyze host  
392 sRNAs not just at the parent level, but also the fragment level, as potentially critical observations may  
393 be lost in the grouping of similar sequences for parent analysis.

394 Although bacteria may regulate SR-BI expression<sup>31</sup>, SR-BI regulation of the gut microbiome is  
395 unclear, and the role of SR-BI in regulating circulating non-host bacterial sRNAs on lipoproteins is  
396 completely unknown. To determine if SR-BI contributes to exogenous sRNAs on lipoproteins and in  
397 biofluids, differential expression analysis was performed at both the genome and fragment levels. Only  
398 one bacterial species was found to be significantly altered between SR-BI KO and WT mice, decreased  
399 *Streptomyces* in urine, as determined by genome counts (**Figure 9-Figure Supplement 2A, Figure 9-**  
400 **Source Data 3**). At the individual fragment level, only 3 bacterial sRNAs were significantly altered by  
401 SR-BI-deficiency; one each in APOB, bile, and urine samples (**Figure 9-Figure Supplement 2B,**  
402 **Figure 9-Source Data 4**). These results suggest that SR-BI does not likely regulate non-host bacterial  
403 sRNAs on lipoproteins or in biofluids. Conversely, we found a significant increase in all fungal genome  
404 counts in SR-BI KO mice compared to WT mice (**Figure 9-Figure Supplement 2A, Figure 9-Source**  
405 **Data 3**). These observations were not likely the result of a few dominant reads shared across all fungal  
406 genomes as we failed to find any individual fungal sRNAs that were significantly affected by the loss of  
407 SR-BI (**Figure 9-Figure Supplement 2B**). To determine if SR-BI-deficiency in mice results in changes  
408 to the most abundant sequences in each group, independent of RNA class or genotype, differential  
409 expression analysis was performed for the top 100 reads filtered in the class-independent analysis.  
410 Nonetheless, we only found changes to the most abundant reads on lipoproteins in SR-BI KO mice  
411 compared to WT mice (**Figure 9-Figure Supplement 3, Figure 9-Source Data 5**).

412



## 413 **Discussion**

414 High-throughput sequencing of sRNAs has revealed a complex landscape of various types of sRNAs in  
415 cells and extracellular fluids, many of which have not been studied. Currently, there is a great need for  
416 tools that can extract many types of sRNAs and their distinct features from sequencing datasets. Here,  
417 we used sRNA-seq and TIGER to profile most sRNA classes on HDL and APOB particles and  
418 compared these profiles to liver, bile, and urine. Using this approach, we found that HDL and APOB  
419 particles transport a wide-variety of host sRNAs, including tDRs, rDRs, snDRs, and many other  
420 miscRNAs. Moreover, we found that exRNAs on lipoproteins harbored unique features, such as,  
421 enrichment of poly-uridylation NTA events on miRNAs and discrete length distributions for HDL and  
422 APOB particles. Furthermore, lipoproteins were found to transport a multitude of non-host sRNAs likely  
423 derived from bacterial and fungal species of the microbiome and environment. Many of these non-host  
424 sRNAs were found to be likely processed from parent tRNAs and rRNAs. Using TIGER, we were also  
425 able to define each sample type by their most abundant sRNAs independent of class or species, which  
426 is particularly suited for the study of exRNA. Furthermore, the TIGER pipeline allows for the  
427 quantification and differential expression analysis of sRNAs at both the parent and fragment levels. This  
428 strategy allowed our determination that SR-BI has a limited role in regulating cellular and extracellular  
429 sRNAs, which would not have been feasible with other analysis strategies that focus solely on the  
430 parent RNA organization. Overall, this study demonstrates the power of expanding sRNA-seq analysis  
431 beyond canonical miRNAs and exploring the full breadth of host and non-host sRNAs in every dataset.

432 Although many researchers are using high-throughput sequencing to quantify sRNAs, many  
433 investigators do not take advantage of the enormous amount of information contained within sRNA-seq  
434 datasets. The mammalian transcriptome is immensely diverse and complex, and thus, requires new  
435 analytical tools and novel strategies to address the many distinct features of different sRNA classes  
436 and contributing species<sup>10, 12, 32</sup>. TIGER is designed to incorporate both host and non-host sRNA  
437 analysis into a modular design that allows for custom prioritization and parallel alignments to both

438 genomes and transcripts (libraries), and organizes data at the parent RNA, fragment, and class-  
439 independent levels. The seven modules include preprocessing, host genome and database, non-host  
440 library, non-host genome, class-independent, summary, and unmapped. For host miRNAs, we  
441 expanded miRNA analysis to include 5' and 3' terminal isomiRs and 3' NTAs. Furthermore, we  
442 extended our analysis of annotated host sRNAs to include tDRs, rDRs, snDRs, snoDRs, lncDRs, and  
443 many other less studied classes, e.g. yDRs. A key feature of TIGER is the alignment strategy for host  
444 tDRs and rDRs which includes mapping to the host genome and mature transcripts in corresponding  
445 databases, which overcomes challenges posed by introns<sup>24, 33</sup>. Another key advance in our pipeline is  
446 the parallel analysis of host sRNAs at the parent and individual fragment levels. Organization of sRNAs  
447 at the parent level allows for categorical analysis and positional coverage alignments which provides  
448 information on parent RNA processing (cleavage). Conversely, analysis of sRNAs at the individual  
449 sequence (fragment) level aids biomarker discovery and is critical to determining biological functions.  
450 Collectively, these features represent a substantial advance for the analysis of endogenous host  
451 sRNAs across all types of samples.

452 A critical difference between cellular RNA and exRNA profiles is the presence of non-host sRNAs  
453 present in exRNA samples<sup>1, 34, 35</sup>. ExRNAs hold great potential as disease biomarkers, indicators of  
454 specific cell phenotypes and damage, intercellular communication signals, and drug targets for future  
455 therapies<sup>36-38</sup>. Current sRNA-seq analysis pipelines are not particularly suitable for the study of exRNAs  
456 as many are restricted to only canonical miRNAs, or a limited number of host sRNAs, and lack analysis  
457 of non-host sRNAs, which will likely be a major focus of future investigations. Based on a previous  
458 study reporting that bacterial sRNAs are present in human plasma, TIGER was designed to identify  
459 exogenous bacterial and fungal sRNAs. Strikingly, we found that the majority of sRNAs on HDL and  
460 APOB particles are likely from bacteria present in the microbiome and environment. These non-host  
461 sRNAs are not likely contamination products due to several observations. First, we were not able to  
462 detect candidate bacterial sRNAs in control buffer used to isolate the lipoproteins by real-time PCR.

463 Moreover, reads aligning to bacterial and fungal genomes were not likely contamination of reagents  
464 used for sequencing preparation as most of these reads were not present in liver datasets. Next, we  
465 found very low correlation between lipoprotein samples for non-host bacterial and fungal sRNAs  
466 suggesting that there was not a common source of bacterial or fungal RNA in the preparation reagents.  
467 In addition, we found that bacterial and fungal sRNAs on HDL were enriched for short length sRNAs as  
468 compared to APOB particles, a pattern that was also observed for host sRNAs, thus supporting a  
469 common mechanism of loading or association for sRNAs that is different for HDL and APOB particles.  
470 Moreover, we found that non-host bacterial sRNA profiles were distinct for HDL and APOB at the  
471 fragment level, as demonstrated by PCoA and PERMANOVA. Collectively, these results strongly  
472 support that HDL and APOB particles transport distinct sets of non-host sRNAs that are not likely due  
473 to bacterial and fungal contamination or foreign RNA in reagents or the research environment.

474 The inclusion of non-host reads in our analysis greatly increased our ability to account for reads in  
475 lipoprotein datasets. Nevertheless, there are many exogenous sRNAs that could be neither processed  
476 from annotated transcripts in databases nor originate from species currently represented in the HMB  
477 project. Therefore, another key feature of the TIGER pipeline is the ability to analyze data independent  
478 of species identification or library annotation. As such, class-independent analysis extracts more data  
479 and eliminates a potential barrier to the discovery of biomarkers and intercellular communication  
480 signals. Notably, class-independent analysis of exRNAs captures sRNA sequence, length, and  
481 abundance which are the important defining characteristics of biomarkers in extracellular fluids and  
482 bioactivity in recipient cells. The TIGER pipeline also advances sRNA-seq analysis through the  
483 incorporation of high-end comparative analyses and data visualizations, including PCoA,  
484 PERMANOVA, hierarchical clustering and correlations, positional coverage maps, circular tree maps,  
485 circos linkage maps, and ternary plots. The TIGER pipeline addresses many issues in sRNA-seq  
486 analysis; however, we have identified a few limitations to the software. Although the TIGER pipeline is  
487 designed to quantify 5' and 3' variants, it does not currently identify internal modifications, ADAR editing

488 events, or single nucleotide polymorphisms. This feature would aid in the study of tDRs, which are  
489 heavily modified, and would potentially improve analysis of non-host sRNAs where reference genomes  
490 may be lacking. The ability to quantify internal variance is a key feature of Chimira, as well as other  
491 software, including UEA workbench<sup>39</sup>, and MAGI<sup>40</sup>. Furthermore, the TIGER pipeline does not include  
492 the analysis of PIWI-Interacting RNAs (piRNA) and a few other sRNAs, including promoter-associated  
493 sRNAs, which present unique challenges in alignments, quantification, and nomenclature<sup>41</sup>. Future  
494 versions of the pipeline will include less studied sRNA classes and the ability to discover new host  
495 sRNAs, as the current pipeline does not have the feature to identify novel miRNAs based on adjacent  
496 genomic sequences which is an output of other pipelines<sup>42, 43</sup>. Despite these limitations, the TIGER  
497 pipeline sets forth many improvements to sRNA-seq analysis.

498 In summary, the value of any sequencing data analysis pipeline, ultimately, is the ability to extract  
499 the most useable information from the generated data. Therefore, the goal of TIGER was to assess  
500 both host and non-host sRNAs, which greatly improved the ability to account for more reads in our  
501 sRNA-seq datasets, particularly exRNAs. TIGER also advances the field in its ability to analyze host  
502 sRNAs at the parent and fragment levels and non-host sRNAs at the genome and fragment levels. This  
503 approach may be critical to discovering novel biomarkers and intercellular communication signals that  
504 would be masked by analyzing the sRNAs by their parent RNAs. Likewise, TIGER analyzes sRNAs by  
505 class and species (genome) as well as class-independent approaches. This is very important for the  
506 study of exRNAs where the contributing parent RNA may not be annotated for the host genome, or the  
507 contributing (exogenous) species for highly abundant sRNAs may not be curated in microbiome  
508 databases. The TIGER pipeline is particularly suited for lipoprotein sRNAs which are predominantly  
509 rRNA-derived fragments of bacterial origin. Using TIGER, we were able to make critical observations  
510 comparing lipoprotein sRNAs to liver and biofluids that would not be observed by existing pipelines.  
511 Therefore, this tool is well-suited for the analysis of exRNA.

512

513 **Materials and Methods:**

514 Animal Studies: Plasma, basal bile, urine, and livers were collected from wild-type (WT) and SR-BI-  
515 deficient (*B6;129S2-Scarb1tm1Kri/J*, SR-BI KO) mice, as previously described<sup>44</sup>. Mice were  
516 anesthetized with urethane (1g/kg, i.p.). The common bile duct was ligated and the gall bladder  
517 cannulated to divert bile into collection tubes. Basal bile was collected for a period of 30 min. Mice were  
518 then exsanguinated, blood was collected from the abdominal aorta in EDTA coated tubes and placed  
519 on wet ice, and tissues were dissected and snap frozen in liquid nitrogen. Plasma and tissues were  
520 stored at -80°C prior to analysis. All animal procedures were completed under active and approved  
521 IACUC protocols.

522

523 Lipoprotein isolation: To separate HDL and apolipoprotein B (APOB)-containing lipoproteins from  
524 mouse plasma, 200 µL of 0.22-µm filtered-plasma samples were diluted to 500 µL in size-exclusion  
525 chromatography (SEC) running buffer (10 mM Tris-HCl, 0.15 M NaCl, 0.2% NaN<sub>3</sub>) and injected an  
526 ÄKTA SEC system (GE Healthcare) with three in-series Superdex-200 Increase gel filtration columns  
527 (10/300 GL; GE Healthcare). Samples were applied to the column with a flow rate of 0.3 mL/min at  
528 room temperature and eluate collected as 72 x 1.5 mL fractions using a F9-C 96-well plate fraction  
529 collector (GE Healthcare). Each fraction was analyzed for total protein (BCA; Pierce), total cholesterol  
530 (Raichem), and triglycerides (Raichem) to identify fractions corresponding with HDL and APOB  
531 particles. Due to the SEC set-up, we were not able to separate VLDL from LDL particles, and thus, we  
532 collected fractions covering both lipoprotein classes, referred to here as APOB. Fractions  
533 corresponding with each lipoprotein group were pooled, concentrated with Amicon Ultra-4 10 kDa  
534 centrifugal filters (Millipore) to <200 µL volume, and protein concentrations were quantified by BCA  
535 assays (Pierce). Based on the distribution of total cholesterol, triglycerides, and protein, fractions  
536 corresponding to HDL and APOB were collected, pooled, and concentrated.

537

538 RNA Isolation: To differentiate lipoprotein sRNA signatures from liver and biofluids, and determine the  
539 impact of SR-BI-deficiency, samples were collected from *Scarb1*<sup>-/-</sup> (SR-BI KO) and wild-type (WT) mice.  
540 Total RNA was extracted from HDL (WT N=7, SR-BI KO N=7) and APOB (WT N=7, SR-BI KO N=7)  
541 particles, as well as livers (WT N=7, SR-BI KO N=7), bile (WT N=7, SR-BI KO N=6), and urine (WT  
542 N=5, SR-BI KO N=6). RNA was isolated from equal inputs of either bile (volume), liver (mg), HDL  
543 (protein) or APOB (protein) using miRNAEasy Mini kits (Qiagen). Specifically, 30  $\mu$ L of primary bile, 120  
544  $\mu$ g of APOB, 180  $\mu$ g of HDL or 20 mg of liver were added to 1 mL of Qiazol. Livers were homogenized  
545 in Qiazol with High-Impact Zirconium beads using a Bead Bug Homogenizer (Benchmark Scientific).  
546 After removal of beads, subsequent steps for liver RNA extraction were followed according to  
547 manufacturer's protocol. Bile, APOB and HDL RNA isolations were processed according to  
548 manufacturer's protocol, except that after addition of ethanol, samples were incubated at -80°C  
549 overnight before application to isolation columns, and were eluted with a volume of 50  $\mu$ L. Liver RNA  
550 samples were quantified by Take3 plates (BioTek).

551

552 Real-Time PCR: Total RNA from equimolar amounts of HDL or APOB protein and equivolume amounts  
553 of bile or urine samples were diluted 1:10; 50 ng of total RNA from liver was used for reverse  
554 transcription using either miRCURY LNA universal RT kit (Exiqon) or TaqMan miRNA Reverse  
555 Transcription kit, as per manufacturer's instructions. Real-time PCR was performed with the  
556 QuantStudio 12K Flex Real-Time PCR System (Life Technologies) using either: A) miRCURY LNA  
557 SYBR Green PCR kit (Exiqon) and either miRNA-specific or custom-sequence specific LNA probes  
558 (Exiqon) or B) TaqMan miRNA-specific probes. Relative quantitative values (RQV) were determined for  
559 both HDL and cellular miRNA analyses.  $RQV = 2^{-dCt}$ . *exo\_rDR\_Pflo23S* 5'-  
560 AGAGAACTCGGGTGAAGGAACT-3', *exo\_rDR\_Vsp* 5'-TGGGTGTGACGGGGAAGCAGG-3',  
561 *exo\_rDR\_Jliv* 5'-GACCAGGACGTTGATAGGCTGGGTGTGGAAGTG-3', *miscRNA\_Rpph1* 5'-

562 CGGGCCTCATAACCCAATTCAGACTACTCTCCCCGCCCTC-3', snDR\_Gm26232 5'-  
563 GCGGGAAACTCGACTGCATAATTTGTGGTAGTGGGGGACTGCGTTCGCGCTCTCCCCTG-3',  
564 snDR\_Gm22866 5'-ATAATTTGTGGTAGTGGGG-3', tDR-GluCTC 5'-  
565 TCCCTGGTGGTCTAGTGGTTAGGATTCGGCGCTCTC-3', and tDR-GlyGCC 5'-  
566 GCATTGGTGGTTCAGTGGTAGAATTCTCGC-3'. For HDL, APOB, bile, and urine samples, an  
567 arbitrary housekeeping Ct = 32 was applied, and RQVs for liver sRNAs were normalized by U6.

568

569 Small RNA sequencing: NEXTflex Small RNA Library Preparation Kits v3 for Illumina® Platforms (BioO  
570 Scientific) were used to generate cDNA libraries for sRNA-seq. Briefly, 1 µg of liver total RNA was used  
571 as input for adapter ligation, as per manufacturer's protocol. For bile, APOB and HDL RNA, 10.5 µL  
572 (21%) of the RNA isolation eluate was used as input for adapter ligation. Library generation was  
573 performed according to manufacturer's protocol (BioO Scientific) with a modification to the amplification  
574 step, as liver libraries received 18 cycles and bile, APOB and HDL libraries received 27 cycles. After  
575 amplification, samples were size-selected using a Pippin-Prep (Sage Science) -- set for a range of 135-  
576 200 nts in length -- and subsequently purified and concentrated using DNA Clean and Concentrator 5  
577 kit (Zymo). Individual libraries were then screened for quality by High-Sensitivity DNA chips using a  
578 2100 Bioanalyzer (Agilent) and quantified using High-Sensitivity DNA assays with Qubit (Life  
579 Technologies). Equal concentrations of all individual libraries were pooled for multiplex sequencing  
580 runs, and concentrated using DNA Clean and Concentrator 5 kit (Zymo). For rigor in down-stream  
581 comparisons, all 66 sequencing libraries were randomized and run independently on three individual  
582 sequencing lanes. Single-end sequencing (75 cycles) of multiplexed libraries were performed on an  
583 Illumina NextSEQ 500 at the Vanderbilt Technologies for Advanced Genomics (VANTAGE) core  
584 laboratory. Each library was sequenced at an average depth of 16.28 million reads/sample.

585



586 Data analysis: The TIGER pipeline has many unique analysis features built into seven modules for low-  
587 level and high-level analyses with data visualization packages. The first module contains pre-  
588 processing steps (green) prior to data analysis (**Figure 1**). To assess raw data quality, FastQC was  
589 performed at the raw read level to check for base quality, total read counts, and adapter identification.  
590 Cutadapt was then used to trim 3' adapters from processed reads (-a  
591 TGAATTCTCGGGTGCCAAGG). Although this pipeline can analyze sRNA-seq data prepared by  
592 different library generation methods, TIGER was optimized to analyze sRNA-seq data prepared by  
593 ligation of adapters containing 4 terminal degenerate bases, which reduce ligation bias (e.g. BioO  
594 Scientific NEXTflex Small RNA-seq kit v3). Cutadapt was then used to remove the first and last 4 bases  
595 from the trimmed reads and all trimmed reads <16 nts in length were removed (-m 16 -u 4 -u -4). After  
596 trimming, read length distributions were plotted and FastQC was performed on trimmed reads to  
597 validate the efficiency of adapter trimming. The processed reads were then summarized and plotted. To  
598 generate identical read files, trimmed reads in each sample were collapsed into non-redundant  
599 "identical" reads in FASTQ format and copy numbers were recorded for downstream analysis.  
600 Preprocessed reads were then analyzed by the Host Genome & Database (blue) and Class-  
601 Independent (red) modules in parallel (**Fig.1**). In the Host Genome & Database alignment module  
602 (blue), bowtie (v1.1.2) was used to map reads to a costumed database with option (-a -m 100 --best -  
603 strata -v 1) which allows 1 mismatch (MM) and 100 multi-mapped loci, and only the best matches were  
604 recorded. The costumed database was constructed by the host genome and known sequences of host  
605 mature transcripts curated in specific library databases – tRNAs (<http://gtrnadb.ucsc.edu/GtRNAdb2/>)  
606 and rRNA ([http://archive.broadinstitute.org/cancer/cga/rnaseqc\\_download](http://archive.broadinstitute.org/cancer/cga/rnaseqc_download)). A small number of parent  
607 tRNA genes contain introns and the mature transcript differs from the genomic sequence; therefore, the  
608 incorporation of mature tRNA transcripts from GtRNAdb database into the genomic alignment  
609 overcame these limitations. This approach allows for the detection of tDRs spanning exon junctions and  
610 allows reads the chance to be mapped to other non-tRNA loci in the genome with best alignment score  
611 which reduces the false positive tDR reads that can result from database only alignment strategies.



612 Counting and differential expression analysis of miRNAs, tDRs, rDRs, snDRs, snoDRs, and other  
613 miscellaneous sRNAs (miscRNA), including yDRs and lincDRs, were performed. The pipeline does not  
614 quantify Piwi-interacting RNA (piRNA) or circular RNAs (circRNA), but this function can be amended.  
615 All prepossessed quality reads were assigned to different classes of annotated sRNAs using distinct  
616 rules -- miRNA: 1 MM,  $\geq 16$ nt, offset -2, -1, 0, 1, 2 and tDR, snDRs, snoDRs, yDRs, and miscRNAs: 1  
617 MM,  $\geq 16$ nt, overlap  $\geq 0.9$  overlap. Based on the extensive genomic coverage of lncRNAs and repetitive  
618 elements and conservation of rRNAs, the TIGER pipeline applies more stringent assignment rules for  
619 lncDRs and rDRs – perfect match,  $\geq 20$  nt, and  $\geq 90\%$  overlap with parent lncRNAs or rRNAs.  
620 Furthermore, reads assigned to lncDRs must only be aligned to lncRNA coordinates and not to any  
621 other loci in the genome. All reads  $\geq 20$  nts in length and not aligned to the costumed database were  
622 extracted and tested for alignment as non-host reads. After tabulation of read counts, high-end  
623 analyses were performed on host sRNAs. These include categorical analysis and visualization,  
624 principal component analysis, hierarchical clustering and correlation of samples and groups at the  
625 parent and individual fragment levels. Differential expression detection of tabulated read counts were  
626 performed by DEseq2<sup>45</sup>. In addition, miRNAs were analyzed at the canonical, isomiR, NTA, NTA base,  
627 and isomiR NTA levels. Non-host reads were then analyzed using the Non-Host Genome (Purple) and  
628 Non-Host Library (Gold) modules in parallel (**Fig.1**). In the Non-Host Genome module, reads were  
629 aligned in parallel to two collections of bacterial genomes: a human microbiome (HMB) collection and a  
630 hand-curated list of environmental bacteria observed during sequencing of human and mouse  
631 lipoproteins. The HMB list was compiled by reducing 3,055 bacterial genomes available from the  
632 Human Microbiome Project ([www.hmpdacc.org](http://www.hmpdacc.org)) to single non-redundant genera, and extracting the  
633 largest available complete genome for each genera. Conversely, to generate the environmental  
634 bacteria list, the top 100 most abundant sequences in a control HDL cohort, that were not mapped to  
635 the host genome, were submitted to NCBI for BLASTn. All hits that showed 100% coverage and 100%  
636 identity were then compiled; non-redundant genera were extracted; redundant genera to the HMB were  
637 removed. Representative genomes from the remaining species were then compiled to the

638 environmental bacteria list (ENV). Additionally, a small group of fungal genomes associated with the  
639 human pathology were also collected. The HMB, ENV, and fungal modules contain 206, 167, 8  
640 representative genomes, respectively. Due to high conservation between bacterial genomes and multi-  
641 mapping issues, a different bowtie option (-a -m 1000 --best -strata -v 0) was used which allowed  
642 perfect match only and 1000 multi-mapped loci. Reads were aligned to the HMB, ENV, and fungal  
643 groups in parallel and, thus, the same reads could have been counted in multiple groups. The fraction  
644 of reads that align to both databases (HMB, ENV) and the reads that are unique to specific databases  
645 were plotted. Differential expression and high-end analyses, as described above, were performed at the  
646 genome level (total normalized read count for each genome) and at the individual read level. In parallel,  
647 non-host reads were also analyzed by the Non-Host Library (Gold) module where they were aligned to  
648 non-coding RNA databases with same bowtie option as non-host genome analysis. To identify possible  
649 non-host miRNAs (xenomiRs) in sRNA-seq datasets, all non-host reads were aligned perfectly to  
650 annotated miRNAs in miRBase (miRBase.org) and tabulated. Similarly, non-host reads were aligned to  
651 all tRNAs in the GtRNAdb database (GtRNAdb2). Extensive categorical analysis of parent non-host  
652 tRNAs were performed at the kingdom, genome (species), amino acid, anti-codon, and fragment (read)  
653 levels. All assigned non-host tDRs underwent differential expression analysis, high-end analysis, and  
654 data visualization, as described above. Non-host reads were also aligned to prokaryotic and eukaryotic  
655 rRNA transcripts in SILVA database (<https://www.arb-silva.de>). TIGER limits the analysis of non-host  
656 rDR to the kingdom level for counting, differential expression analysis and high-end analysis.

657 The TIGER pipeline also analyzed the top most abundant reads independent of class or annotation  
658 in parallel of the host genome, non-host genome, and database modules. The Class-Independent  
659 module (red) ranked and filtered the top 100 most abundant reads in each sample independent of  
660 genomic annotation. The list of top 100 reads from all samples were combined, a count file table was  
661 generated and top 100 overall reads were used to perform hierarchical clustering and correlations at  
662 the individual sample and group levels. Differential expression analyses were performed by DEseq2,

663 and significantly altered sequences were searched in NCBI nucleotide database using BLASTn to  
664 identify possible sources (species). All results from the host genome, class-independent, non-host  
665 genome, and non-host database modules were then analyzed by the Summary & Data Visualization  
666 (dark blue) module (**Fig.1**). In this module, TIGER summarized and organized many of the individual  
667 comparisons. For example, individual volcano plots were graphed into larger matrices grouping  
668 different classes of sRNAs and/or genomic groups (e.g. bacteria and fungi). This module also  
669 generated a comprehensive table for all mapped reads listing the assignments for each read across  
670 modules. Moreover, positional coverage of sRNAs against host parent RNAs were plotted for miRNAs,  
671 tDRs, snDRs, and rDRs. Positional base coverages were also plotted for individual samples, groups,  
672 and significantly altered tDRs and snDRs. For groups, the means of normalized positional coverage  
673 counts (base positional counts per million mapped total reads) for individual samples in the groups  
674 were plotted. Furthermore, this module identified sRNA classes and genomes for the top 100 ranked  
675 reads (analyzed earlier in the Class-Independent module) and graphed the linkages by circos plots.  
676 Finally, this module summarized the read counts in each task and determined the fraction of total reads  
677 that were assigned to any module, genome, or database. For example, pie charts and stacked bar  
678 charts were generated to illustrate the fraction of reads mapped to the host genome and non-host  
679 genome and the fraction of unmapped reads. All unmapped and unaccounted for reads entered the  
680 Final Unmapped Analysis (orange) module (**Fig.1**). In this module, the top 100 analysis was reapplied  
681 to all unmapped and unaccounted reads, as described above. After ranking, filtering, and tabulation,  
682 differential expression analysis was performed and the significantly altered unmapped reads were  
683 searched in BLASTn to identify possible genomes not contained in the TIGER analysis. These unique  
684 features were designed to extensively and exhaustively analyze sRNA-seq data on lipoproteins (e.g.  
685 HDL and apoB particles) and extracellular fluids (e.g. bile and urine) which have many different types of  
686 sRNAs and diverse species.

687

688 Data Visualization: Read counts were reported as both raw counts and normalized count per million  
689 total counts (RPM). RPMs were used for stacked bar plots in each module. Cluster analysis were  
690 performed and visualized by heatmap3<sup>46</sup>. Principle component analysis were performed based on  
691 normalized expression value calculated by the variance stabilizing transformation in DESeq2. DESeq2  
692 was used to perform miRNA, tDR and other sRNA differential expression analyses. Significantly  
693 differential expressed sRNAs with adjusted p-value less <0.05 and absolute fold change >1.5 will be  
694 highlighted in volcano plot (red, increased; blue, decreased) and outputted as tabulated file for further  
695 validation. Differential expression results were plotted as volcano plot, venn diagram, and heatmap.  
696 Categorical analyses of tDRs based on amino acid and anti-codons of the parent tRNAs were also  
697 quantified and plotted. Likewise, categorical analysis of snDRs based on U class were analyzed and  
698 plotted. Non-metric multidimensional scaling of Bray-Curtis dissimilarity indexes, homogeneity analysis  
699 of group dispersions, and principal coordinate analysis visualization was performed using R package  
700 “vegan”. R Packages ggplot2, vegan, ggraph, igraph, reshape2, data.table, RColorBrewer, circlize,  
701 ggtern, and XML were used for data visualization.

702

703 Statistics: For continuous variables, mean and standard error of the mean (S.E.M.) were used.  
704 Comparisons with two variables were calculated using Welch two sample t-tests, two-way Student’s t-  
705 tests, or Mann-Whitney nonparametric tests. For comparisons with more than two variables, linear one-  
706 way analysis of variance (ANOVA) were used. Spearman ranked method was used for calculating the  
707 correlation coefficient (R). Two-sided p value <0.05 was considered statistically significant. Statistical  
708 analyses were performed using R version 3.4.3.

709

710 **Acknowledgments:** We would like to acknowledge Carolin Besenboeck for her assistance in RNA  
711 methods.

712 **Competing interests:** On behalf of the authors, we declare no financial and non-financial competing  
713 interests.

714

715 **Funding:** This work was supported by awards from the National Institutes of Health, National Heart,  
716 Lung and Blood Institute to K.C.V. HL128996, K.C.V. and M.F.L. HL127173, and M.F.L. HL116263.

717 This work was also supported by awards from the American Heart Association to K.C.V. and P.S.  
718 CSA2066001 and R.M.A. POST25710170.

719

## 720 **References:**

- 721 1. Wang K, Li H, Yuan Y, Etheridge A, Zhou Y, Huang D, Wilmes P and Galas D. The complex exogenous RNA  
722 spectra in human plasma: an interface with human gut biota? *PLoS One*. 2012;7:e51009.
- 723 2. Beatty M, Guduric-Fuchs J, Brown E, Bridgett S, Chakravarthy U, Hogg RE and Simpson DA. Small RNAs  
724 from plants, bacteria and fungi within the order Hypocreales are ubiquitous in human plasma. *BMC Genomics*.  
725 2014;15:933.
- 726 3. Quintana JF, Makepeace BL, Babayan SA, Ivens A, Pfarr KM, Blaxter M, Debrah A, Wanji S, Ngangyung  
727 HF, Bah GS, Tanya VN, Taylor DW, Hoerauf A and Buck AH. Extracellular *Onchocerca*-derived small RNAs in host  
728 nodules and blood. *Parasit Vectors*. 2015;8:58.
- 729 4. Vickers KC, Sethupathy P, Baran-Gale J and Remaley AT. Complexity of microRNA function and the role  
730 of isomiRs in lipid homeostasis. *J Lipid Res*. 2013;54:1182-91.
- 731 5. Scott DD and Norbury CJ. RNA decay via 3' uridylation. *Biochim Biophys Acta*. 2013;1829:654-65.
- 732 6. Knouf EC, Wyman SK and Tewari M. The human TUT1 nucleotidyl transferase as a global regulator of  
733 microRNA abundance. *PLoS One*. 2013;8:e69630.
- 734 7. Bartel DP. MicroRNAs: genomics, biogenesis, mechanism, and function. *Cell*. 2004;116:281-97.
- 735 8. Vitsios DM and Enright AJ. Chimira: analysis of small RNA sequencing data and microRNA modifications.  
736 *Bioinformatics*. 2015;31:3365-7.
- 737 9. Vickers KC, Roteta LA, Hucheson-Dilks H, Han L and Guo Y. Mining diverse small RNA species in the deep  
738 transcriptome. *Trends in biochemical sciences*. 2015;40:4-7.
- 739 10. Chen CJ and Heard E. Small RNAs derived from structural non-coding RNAs. *Methods*. 2013;63:76-84.
- 740 11. Li Z, Ender C, Meister G, Moore PS, Chang Y and John B. Extensive terminal and asymmetric processing  
741 of small RNAs from rRNAs, snoRNAs, snRNAs, and tRNAs. *Nucleic Acids Res*. 2012;40:6787-99.
- 742 12. Vickers KC, Roteta LA, Hucheson-Dilks H, Han L and Guo Y. Mining diverse small RNA species in the deep  
743 transcriptome. *Trends in biochemical sciences*. 2015;40:4-7.
- 744 13. Baras AS, Mitchell CJ, Myers JR, Gupta S, Weng LC, Ashton JM, Cornish TC, Pandey A and Halushka MK.  
745 miRge - A Multiplexed Method of Processing Small RNA-Seq Data to Determine MicroRNA Entropy. *PLoS One*.  
746 2015;10:e0143066.
- 747 14. Capece V, Garcia Vizcaino JC, Vidal R, Rahman RU, Pena Centeno T, Shomroni O, Suberviola I, Fischer A  
748 and Bonn S. Oasis: online analysis of small RNA deep sequencing data. *Bioinformatics*. 2015;31:2205-7.

- 749 15. Boon RA and Vickers KC. Intercellular transport of microRNAs. *Arterioscler Thromb Vasc Biol.*  
750 2013;33:186-92.
- 751 16. Vickers KC and Remaley AT. Lipid-based carriers of microRNAs and intercellular communication. *Curr*  
752 *Opin Lipidol.* 2012;23:91-7.
- 753 17. Vickers KC, Palmisano BT, Shoucri BM, Shamburek RD and Remaley AT. MicroRNAs are transported in  
754 plasma and delivered to recipient cells by high-density lipoproteins. *Nat Cell Biol.* 2011;13:423-33.
- 755 18. Cloonan N, Wani S, Xu Q, Gu J, Lea K, Heater S, Barbacioru C, Steptoe AL, Martin HC, Nourbakhsh E,  
756 Krishnan K, Gardiner B, Wang X, Nones K, Steen JA, Matigian NA, Wood DL, Kassahn KS, Waddell N, Shepherd J,  
757 Lee C, Ichikawa J, McKernan K, Bramlett K, Kuersten S and Grimmond SM. MicroRNAs and their isomiRs function  
758 cooperatively to target common biological pathways. *Genome Biol.* 2011;12:R126.
- 759 19. Neilsen CT, Goodall GJ and Bracken CP. IsomiRs--the overlooked repertoire in the dynamic  
760 microRNAome. *Trends Genet.* 2012;28:544-9.
- 761 20. Vickers KC, Sethupathy P, Baran-Gale J and Remaley AT. The Complexity of microRNA Function and the  
762 Role of IsomiRs in Lipid Homeostasis. *J Lipid Res.* 2013.
- 763 21. Baran-Gale J, Fannin EE, Kurtz CL and Sethupathy P. Beta cell 5'-shifted isomiRs are candidate regulatory  
764 hubs in type 2 diabetes. *PLoS One.* 2013;8:e73240.
- 765 22. Burroughs AM, Ando Y, de Hoon MJ, Tomaru Y, Nishibu T, Ukekawa R, Funakoshi T, Kurokawa T, Suzuki  
766 H, Hayashizaki Y and Daub CO. A comprehensive survey of 3' animal miRNA modification events and a possible  
767 role for 3' adenylation in modulating miRNA targeting effectiveness. *Genome Res.* 2010;20:1398-410.
- 768 23. Koppers-Lalic D, Hackenberg M, Bijnsdorp IV, van Eijndhoven MAJ, Sadek P, Sie D, Zini N, Middeldorp  
769 JM, Ylstra B, de Menezes RX, Wurdinger T, Meijer GA and Pegtel DM. Nontemplated nucleotide additions  
770 distinguish the small RNA composition in cells from exosomes. *Cell reports.* 2014;8:1649-1658.
- 771 24. Selitsky SR and Sethupathy P. tDRmapper: challenges and solutions to mapping, naming, and quantifying  
772 tRNA-derived RNAs from human small RNA-sequencing data. *BMC Bioinformatics.* 2015;16:354.
- 773 25. Kaczor-Urbanowicz KE, Kim Y, Li F, Galeev T, Kitchen RR, Koyano K, Jeong SH, Wang X, Elashoff D, Kang  
774 SY, Kim SM, Kim K, Kim S, Chia D, Xiao X, Rozowsky J and Wong DTW. Novel approaches for bioinformatic  
775 analysis of salivary RNA Sequencing data in the biomarker development process. *Bioinformatics.* 2017.
- 776 26. Acton S, Rigotti A, Landschulz KT, Xu S, Hobbs HH and Krieger M. Identification of scavenger receptor SR-  
777 BI as a high density lipoprotein receptor. *Science.* 1996;271:518-20.
- 778 27. Zhang Y, Da Silva JR, Reilly M, Billheimer JT, Rothblat GH and Rader DJ. Hepatic expression of scavenger  
779 receptor class B type I (SR-BI) is a positive regulator of macrophage reverse cholesterol transport in vivo. *J Clin*  
780 *Invest.* 2005;115:2870-4.
- 781 28. Wiersma H, Gatti A, Nijstad N, Oude Elferink RP, Kuipers F and Tietge UJ. Scavenger receptor class B type  
782 I mediates biliary cholesterol secretion independent of ATP-binding cassette transporter g5/g8 in mice.  
783 *Hepatology.* 2009;50:1263-72.
- 784 29. Zanon P, Khetarpal SA, Larach DB, Hancock-Cerutti WF, Millar JS, Cuchel M, DerOhannessian S, Kontush  
785 A, Surendran P, Saleheen D, Trompet S, Jukema JW, De Craen A, Deloukas P, Sattar N, Ford I, Packard C,  
786 Majumder A, Alam DS, Di Angelantonio E, Abecasis G, Chowdhury R, Erdmann J, Nordestgaard BG, Nielsen SF,  
787 Tybjaerg-Hansen A, Schmidt RF, Kuulasmaa K, Liu DJ, Perola M, Blankenberg S, Salomaa V, Mannisto S, Amouyel  
788 P, Arveiler D, Ferrieres J, Muller-Nurasyid M, Ferrario M, Kee F, Willer CJ, Samani N, Schunkert H, Butterworth  
789 AS, Howson JM, Peloso GM, Stitzel NO, Danesh J, Kathiresan S, Rader DJ, Consortium CHDE, Consortium CAE  
790 and Global Lipids Genetics C. Rare variant in scavenger receptor BI raises HDL cholesterol and increases risk of  
791 coronary heart disease. *Science.* 2016;351:1166-71.
- 792 30. Varban ML, Rinninger F, Wang N, Fairchild-Huntress V, Dunmore JH, Fang Q, Gosselin ML, Dixon KL,  
793 Deeds JD, Acton SL, Tall AR and Huszar D. Targeted mutation reveals a central role for SR-BI in hepatic selective  
794 uptake of high density lipoprotein cholesterol. *Proc Natl Acad Sci U S A.* 1998;95:4619-24.



- 795 31. Zhong CY, Sun WW, Ma Y, Zhu H, Yang P, Wei H, Zeng BH, Zhang Q, Liu Y, Li WX, Chen Y, Yu L and Song  
796 ZY. Microbiota prevents cholesterol loss from the body by regulating host gene expression in mice. *Scientific*  
797 *reports*. 2015;5:10512.
- 798 32. Zhang X, Cozen AE, Liu Y, Chen Q and Lowe TM. Small RNA Modifications: Integral to Function and  
799 Disease. *Trends in molecular medicine*. 2016;22:1025-1034.
- 800 33. Telonis AG, Loher P, Kirino Y and Rigoutsos I. Consequential considerations when mapping tRNA  
801 fragments. *BMC Bioinformatics*. 2016;17:123.
- 802 34. Wei Z, Batagov AO, Schinelli S, Wang J, Wang Y, El Fatimy R, Rabinovsky R, Balaj L, Chen CC, Hochberg F,  
803 Carter B, Breakefield XO and Krichevsky AM. Coding and noncoding landscape of extracellular RNA released by  
804 human glioma stem cells. *Nature communications*. 2017;8:1145.
- 805 35. Yeri A, Courtright A, Reiman R, Carlson E, Beecroft T, Janss A, Siniard A, Richholt R, Balak C, Rozowsky J,  
806 Kitchen R, Hutchins E, Winarta J, McCoy R, Anastasi M, Kim S, Huentelman M and Van Keuren-Jensen K. Total  
807 Extracellular Small RNA Profiles from Plasma, Saliva, and Urine of Healthy Subjects. *Scientific reports*.  
808 2017;7:44061.
- 809 36. Quinn JF, Patel T, Wong D, Das S, Freedman JE, Laurent LC, Carter BS, Hochberg F, Van Keuren-Jensen K,  
810 Huentelman M, Spetzler R, Kalani MY, Arango J, Adelson PD, Weiner HL, Gandhi R, Goilav B, Putterman C and  
811 Saugstad JA. Extracellular RNAs: development as biomarkers of human disease. *Journal of extracellular vesicles*.  
812 2015;4:27495.
- 813 37. Zernecke A and Preissner KT. Extracellular Ribonucleic Acids (RNA) Enter the Stage in Cardiovascular  
814 Disease. *Circ Res*. 2016;118:469-79.
- 815 38. Willeit P, Skroblin P, Moschen AR, Yin X, Kaudewitz D, Zampetaki A, Barwari T, Whitehead M, Ramirez  
816 CM, Goedeke L, Rotllan N, Bonora E, Hughes AD, Santer P, Fernandez-Hernando C, Tilg H, Willeit J, Kiechl S and  
817 Mayr M. Circulating MicroRNA-122 Is Associated With the Risk of New-Onset Metabolic Syndrome and Type 2  
818 Diabetes. *Diabetes*. 2017;66:347-357.
- 819 39. Stocks MB, Moxon S, Mapleson D, Woolfenden HC, Mohorianu I, Folkes L, Schwach F, Dalmay T and  
820 Moulton V. The UEA sRNA workbench: a suite of tools for analysing and visualizing next generation sequencing  
821 microRNA and small RNA datasets. *Bioinformatics*. 2012;28:2059-61.
- 822 40. Kim J, Levy E, Ferbrache A, Stepanowsky P, Farcas C, Wang S, Brunner S, Bath T, Wu Y and Ohno-  
823 Machado L. MAGI: a Node.js web service for fast microRNA-Seq analysis in a GPU infrastructure. *Bioinformatics*.  
824 2014;30:2826-7.
- 825 41. Agirre E and Eyras E. Databases and resources for human small non-coding RNAs. *Hum Genomics*.  
826 2011;5:192-9.
- 827 42. An J, Lai J, Lehman ML and Nelson CC. miRDeep\*: an integrated application tool for miRNA identification  
828 from RNA sequencing data. *Nucleic Acids Res*. 2013;41:727-37.
- 829 43. Friedlander MR, Chen W, Adamidi C, Maaskola J, Einspanier R, Knespel S and Rajewsky N. Discovering  
830 microRNAs from deep sequencing data using miRDeep. *Nat Biotechnol*. 2008;26:407-15.
- 831 44. Wang Y, Liu X, Pijut SS, Li J, Horn J, Bradford EM, Leggas M, Barrett TA and Graf GA. The combination of  
832 ezetimibe and ursodiol promotes fecal sterol excretion and reveals a G5G8-independent pathway for cholesterol  
833 elimination. *J Lipid Res*. 2015;56:810-20.
- 834 45. Love MI, Huber W and Anders S. Moderated estimation of fold change and dispersion for RNA-seq data  
835 with DESeq2. *Genome Biol*. 2014;15:550.
- 836 46. Zhao S, Guo Y, Sheng Q and Shyr Y. Advanced heat map and clustering analysis using heatmap3. *BioMed*  
837 *research international*. 2014;2014:986048.

838

839

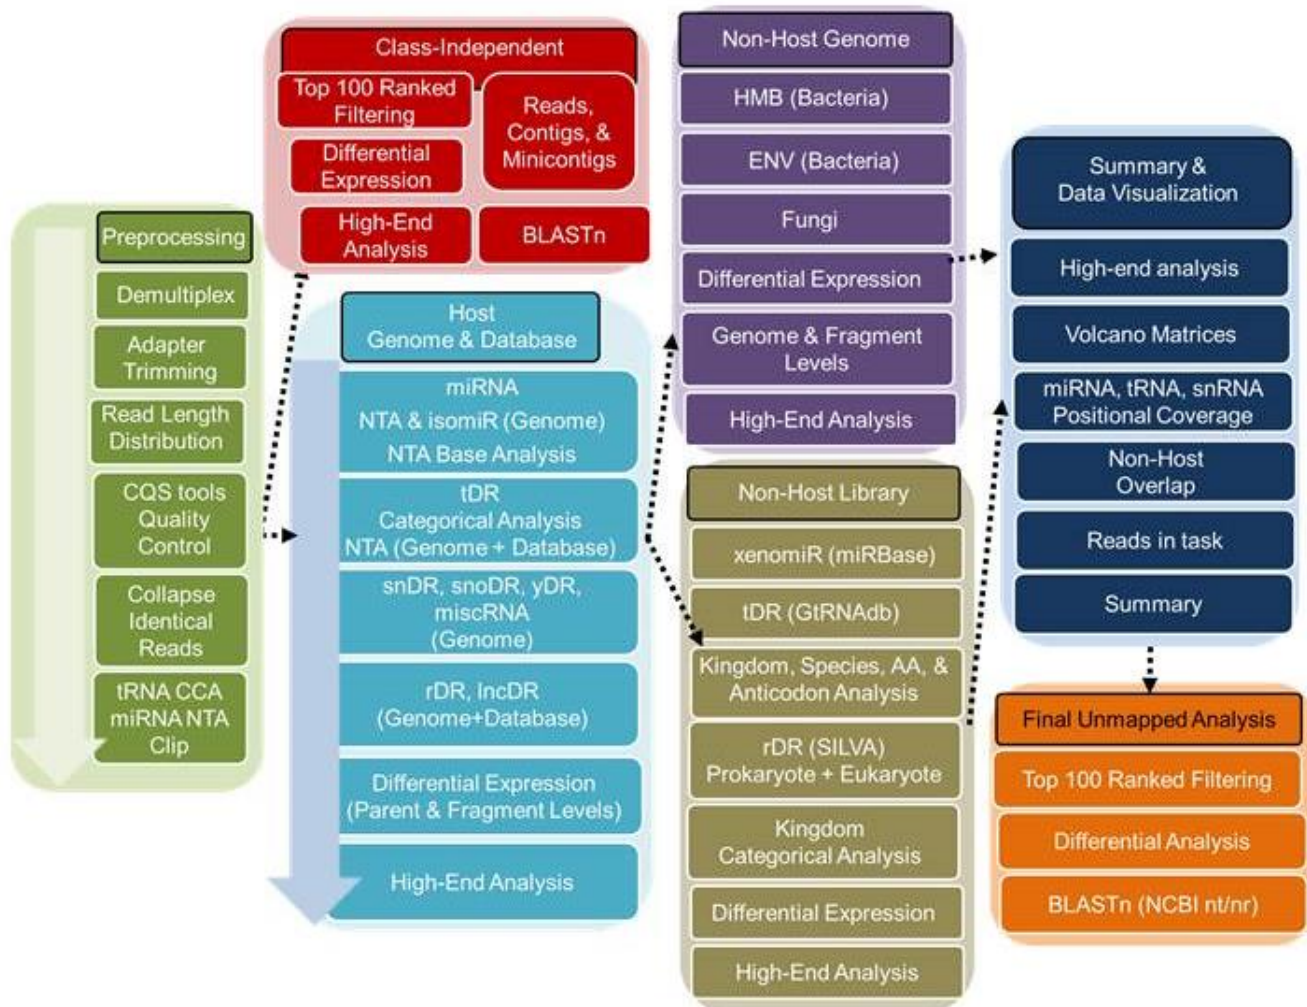

Allen & Zhao Fig.1

840

841 **Figure 1. Schematic of the TIGER sRNA-seq analysis workflow.**

842

843

844



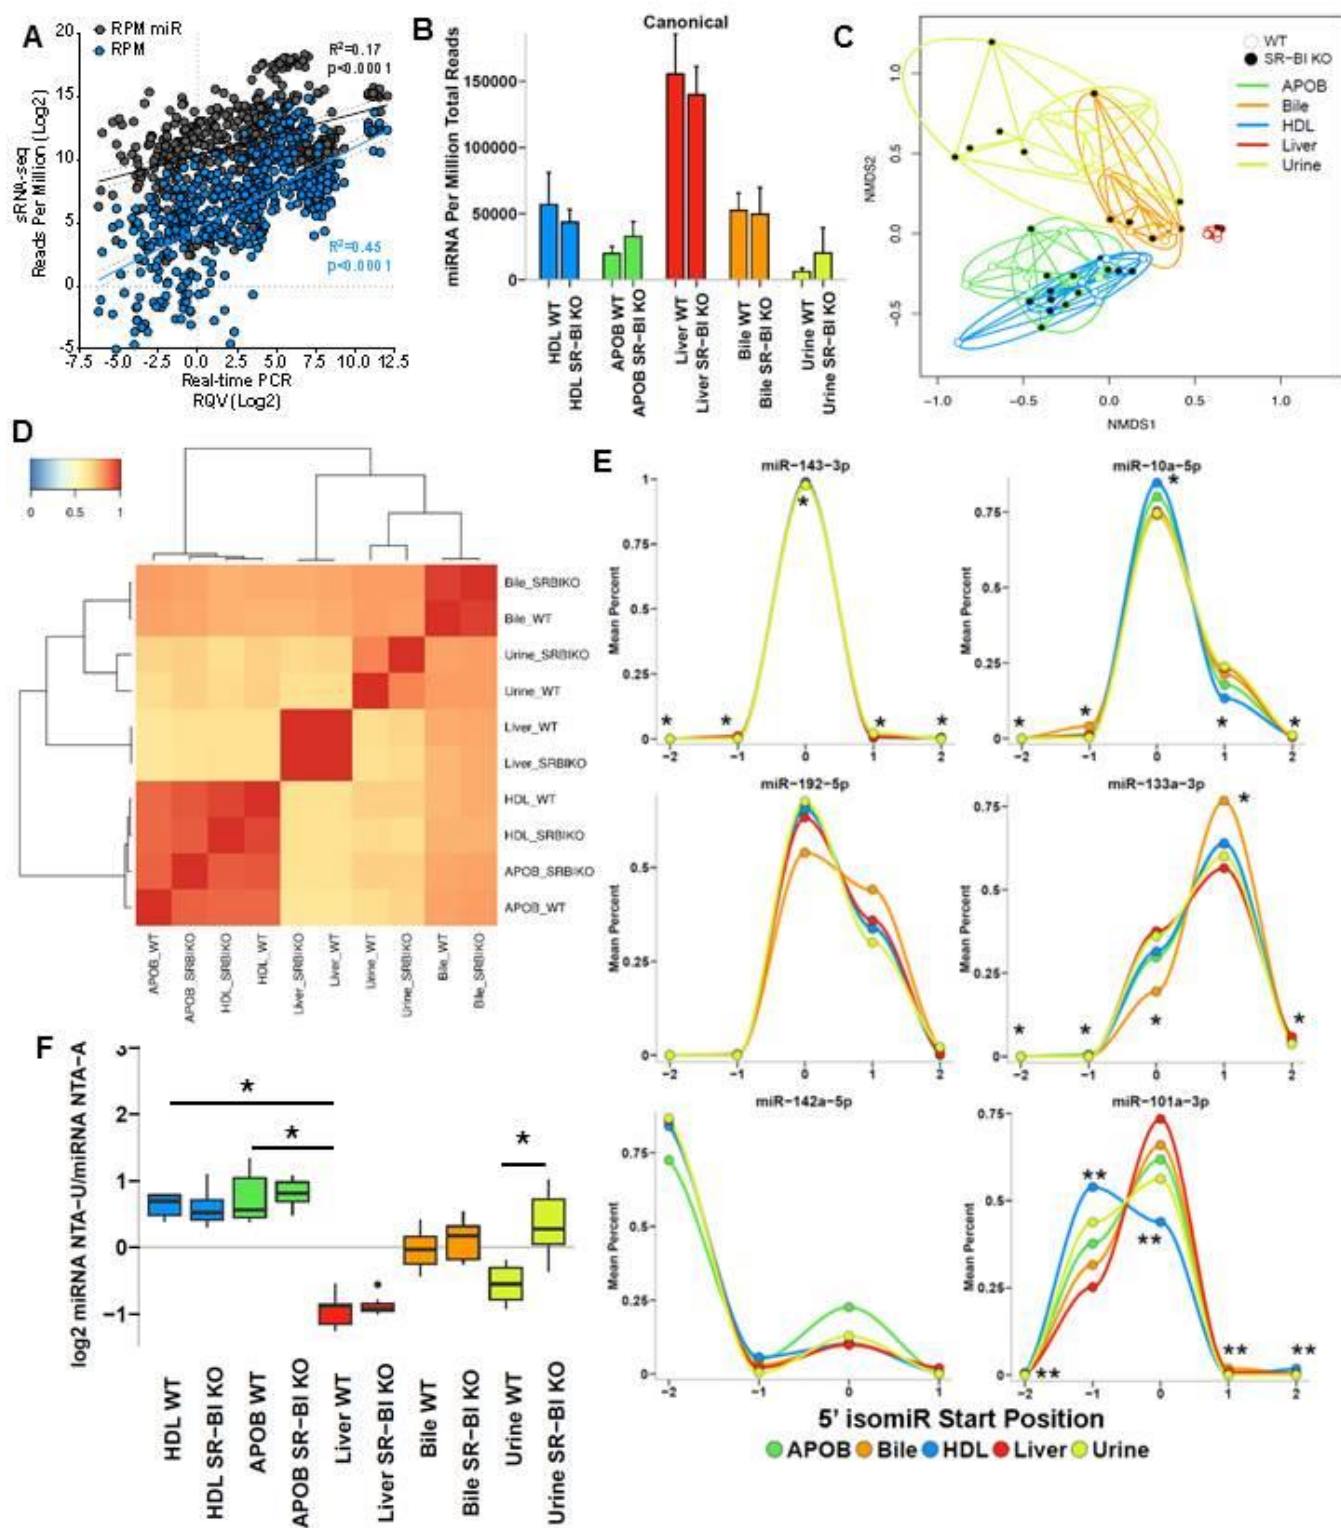

Allen & Zhao Fig.2

845

846

847 **Figure 2. Host miRNAs on lipoproteins have distinct features compared to liver.** WT, wild-type  
848 mice; SR-BI KO, Scavenger receptor BI Knockout mice (*Scarb1*<sup>-/-</sup>). **(A)** Correlation of sRNA-seq reads  
849 per million total reads (RPM, blue) and miRNA reads (RPM miR, gray) to real-time PCR relative  
850 quantitative values (RQV). Spearman correlation. HDL, APOB, liver, bile, and urine samples, N=66. **(B-**  
851 **F)** Results from sRNA-seq analysis. HDL WT, N=7; HDL SR-BI KO N=7; APOB WT, N=7, APOB SR-BI  
852 KO N=7; Liver WT, N=7; Liver SR-BI KO, N=7; Bile WT, N=7; Bile SR-BI KO, N=6; Urine WT, N=5;  
853 Urine SR-BI KO, N=6. **(B)** Abundance of canonical miRNAs. Mean  $\pm$ S.E.M. **(C)** Principal Coordinate  
854 Analysis (PCoA) of canonical miRNA profiles for samples from WT (empty circles) and SR-BI KO (filled  
855 circles) mice. NMDS1, Non-metric multidimensional scaling. **(D)** Heatmap of hierarchical clustered  
856 pairwise correlation (Spearman, R) coefficients between group means for canonical miRNAs. **(E)** Start  
857 position analysis of 5' miRNA variants (isomiR) for combined (WT and SR-BI KO) mouse samples. **(F)**  
858 Ratio of non-templated U (poly-uridylation) to A (poly-adenylation) for miRNAs. Mean  $\pm$ S.E.M. One-way  
859 ANOVA. \* $p < 0.05$ ; \*\* $p < 0.01$

860

861

862

863

864

865

866

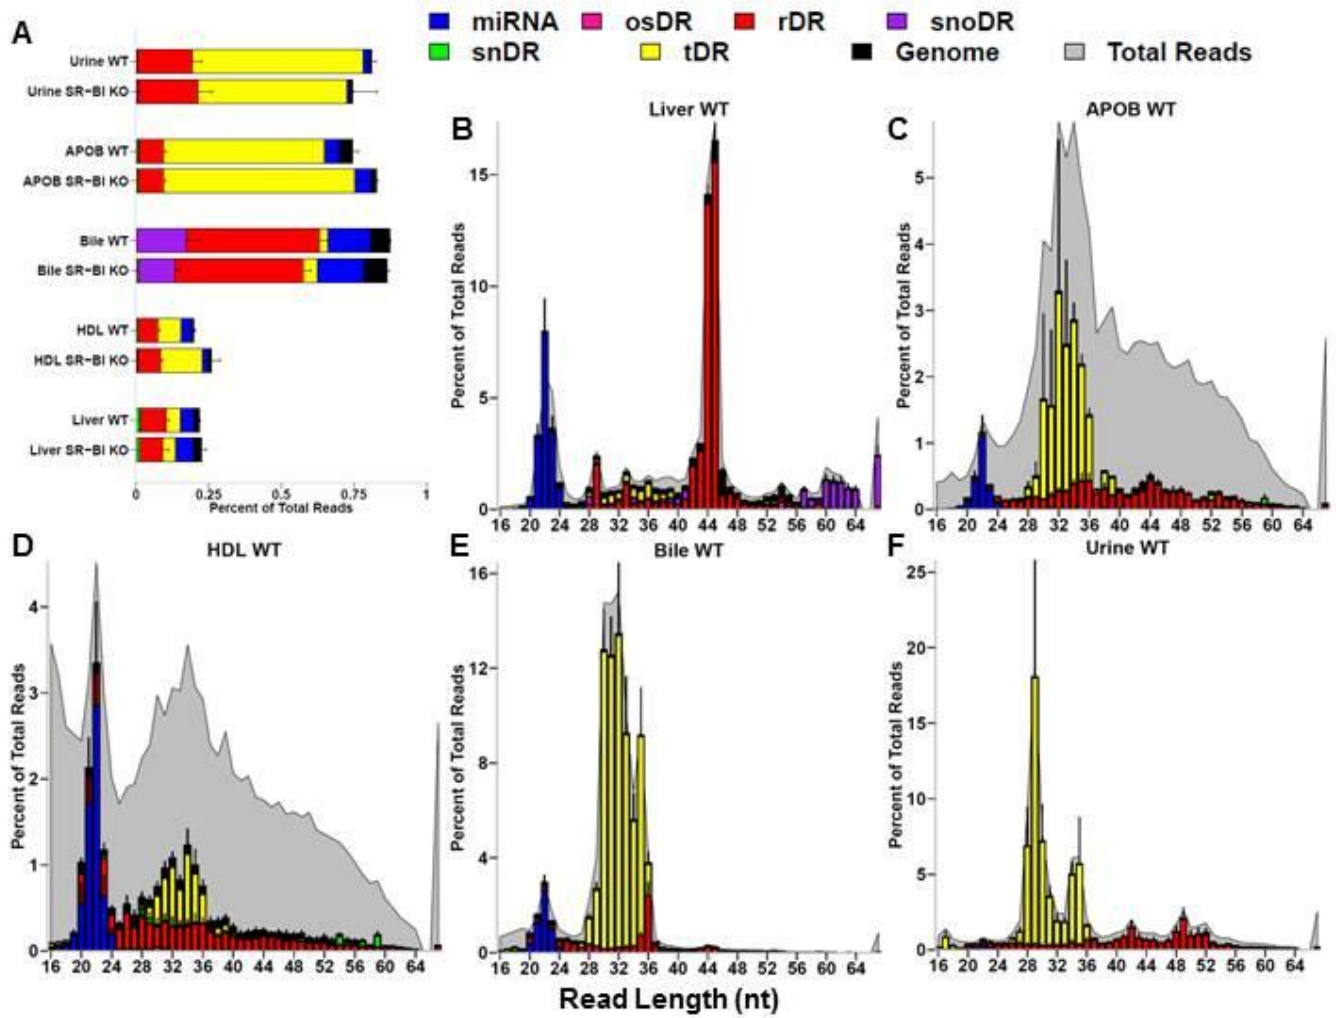

Allen & Zhao Fig.3

867

868

869

870

871

872

873

874 **Figure 3. Host sRNAs account for a minor fraction of total reads in lipoprotein sRNA-seq**  
875 **datasets.** WT, wild-type mice; SR-BI KO, Scavenger receptor BI Knockout mice (*Scarb1*<sup>-/-</sup>). **(A-F)**  
876 Results from sRNA-seq analysis. HDL WT, N=7; HDL SR-BI KO N=7; APOB WT, N=7, APOB SR-BI  
877 KO N=7; Liver WT, N=7; Liver SR-BI KO, N=7; Bile WT, N=7; Bile SR-BI KO, N=6; Urine WT, N=5;  
878 Urine SR-BI KO, N=6. Host tDRs (yellow), rDRs (red), miRNAs (blue), snoDRs (purple), snDRs (green),  
879 miscellaneous RNA (pink), and unannotated genome (black). **(A)** Percent of total reads for host sRNA  
880 classes. Mean  $\pm$ S.E.M. **(B-F)** Distribution of read length by host sRNA classes (colors) and total reads  
881 (gray), as reported by percent of total reads. Mean  $\pm$ S.E.M. **(B)** Liver. **(C)** APOB particles. **(D)** HDL. **(E)**  
882 Bile. **(F)** Urine.

883

884

885

886

887

888

889

890

891

892

893

894

895

896

897

898

899

900

901

902

903

904

905

906



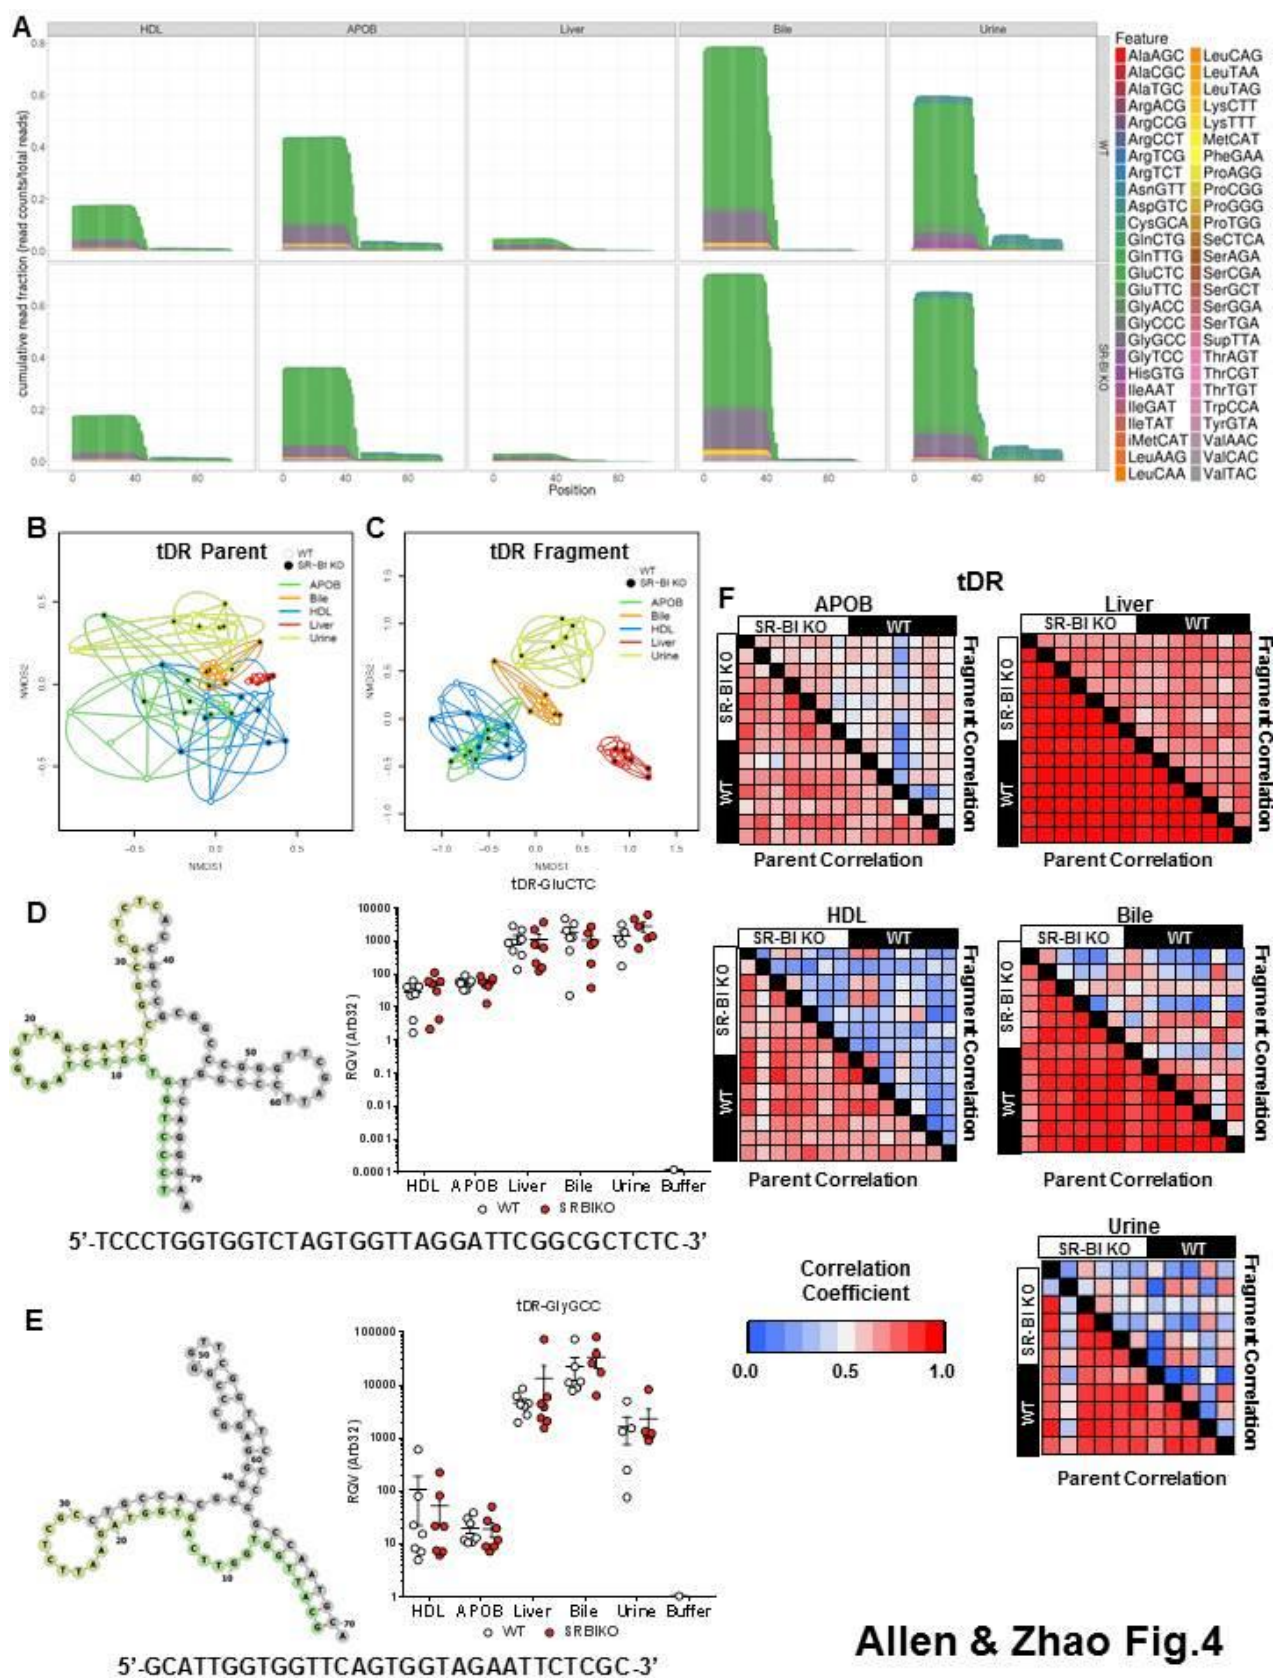

Allen & Zhao Fig.4

908 **Figure 4. Lipoproteins, bile, and urine contain distinct tDR profiles.** WT, wild-type mice; SR-BI KO,  
909 Scavenger receptor BI Knockout mice (*Scarb1*<sup>-/-</sup>). **(A-C,F)** Results from sRNA-seq analysis. **(A)**  
910 Positional coverage maps of tDRs for parent tRNA amino acid anti-codons, as reported as mean  
911 cumulative read fractions (read counts / total counts). **(B-C)** Principal Coordinate Analysis (PCoA) of  
912 tDR profiles based on **(B)** parent tRNAs and **(C)** individual fragments for samples from WT (empty  
913 circles) and SR-BI KO (filled circles) mice. NMDS1, Non-metric multidimensional scaling. **(D-F)** Real-  
914 time PCR analysis of candidate tDRs with predicted folding structures and sequences for **(D)** tDR-  
915 GluCTC and **(E)** tDR-GlyGCC. WT, white circles; SR-BI KO, red circles. **(F)** Heatmaps of correlation  
916 coefficients (Spearman, R) for tRNA parents and individual tDR fragments across samples within each  
917 group. HDL WT, N=7; HDL SR-BI KO N=7; APOB WT, N=7, APOB SR-BI KO N=7; Liver WT, N=7;  
918 Liver SR-BI KO, N=7; Bile WT, N=7; Bile SR-BI KO, N=6; Urine WT, N=5; Urine SR-BI KO, N=6.

919

920

921

922

923

924

925

926

927

928

929

930

931

932

933

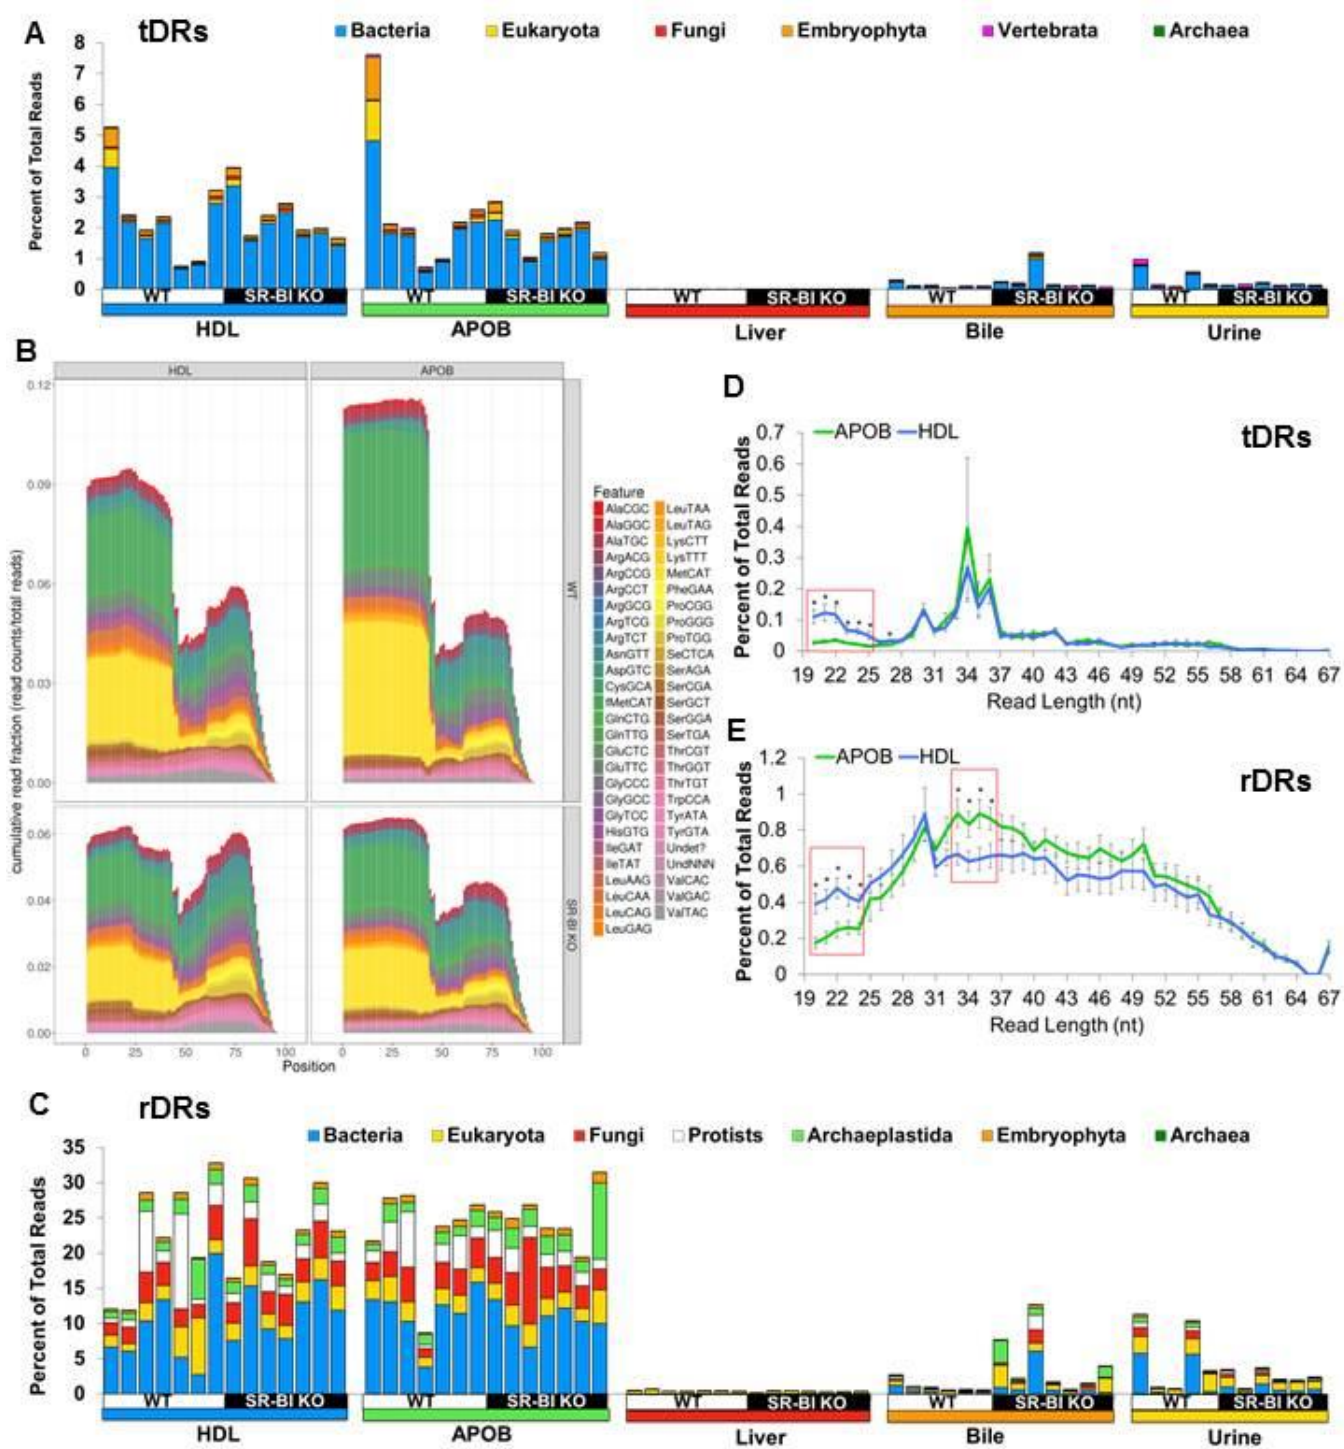

Allen & Zhao Fig.5

934

935

936



937 **Figure 5. Lipoproteins transport exogenous non-host tDRs and rDRs.** WT, wild-type mice; SR-BI  
938 KO, Scavenger receptor BI Knockout mice (*Scarb1*<sup>-/-</sup>). **(A)** Stacked bar plots of non-host tDRs aligned  
939 to parent tRNAs across kingdoms and higher organizations – bacteria, blue; eukaryota, yellow; fungi,  
940 red; embryophyta, orange; vertebrata, purple; archaea, green – as reported as percent of total reads.  
941 **(B)** Positional coverage maps of non-host tDRs for parent tRNA amino acid anti-codons, as reported as  
942 mean cumulative read fractions (read counts / total counts) for HDL and APOB particles. **(C)** Stacked  
943 bar plots of non-host rDRs aligned to parent rRNAs across kingdoms and higher organizations –  
944 bacteria, yellow; eukaryota, red; fungi, white; protists, purple; archaeplastida, dark blue; embryophyta,  
945 light blue; archaea, green – as reported as percent of total reads. **(D-F)** Distribution of read lengths, as  
946 reported as percent of total reads, for all non-host **(D)** tDRs and **(F)** rDRs. Two-tailed Student's t-tests.  
947 \*p<0.05. HDL WT, N=7; HDL SR-BI KO N=7; APOB WT, N=7, APOB SR-BI KO N=7; Liver WT, N=7;  
948 Liver SR-BI KO, N=7; Bile WT, N=7; Bile SR-BI KO, N=6; Urine WT, N=5; Urine SR-BI KO, N=6.

949

950

951

952

953

954

955

956

957

958

959

960

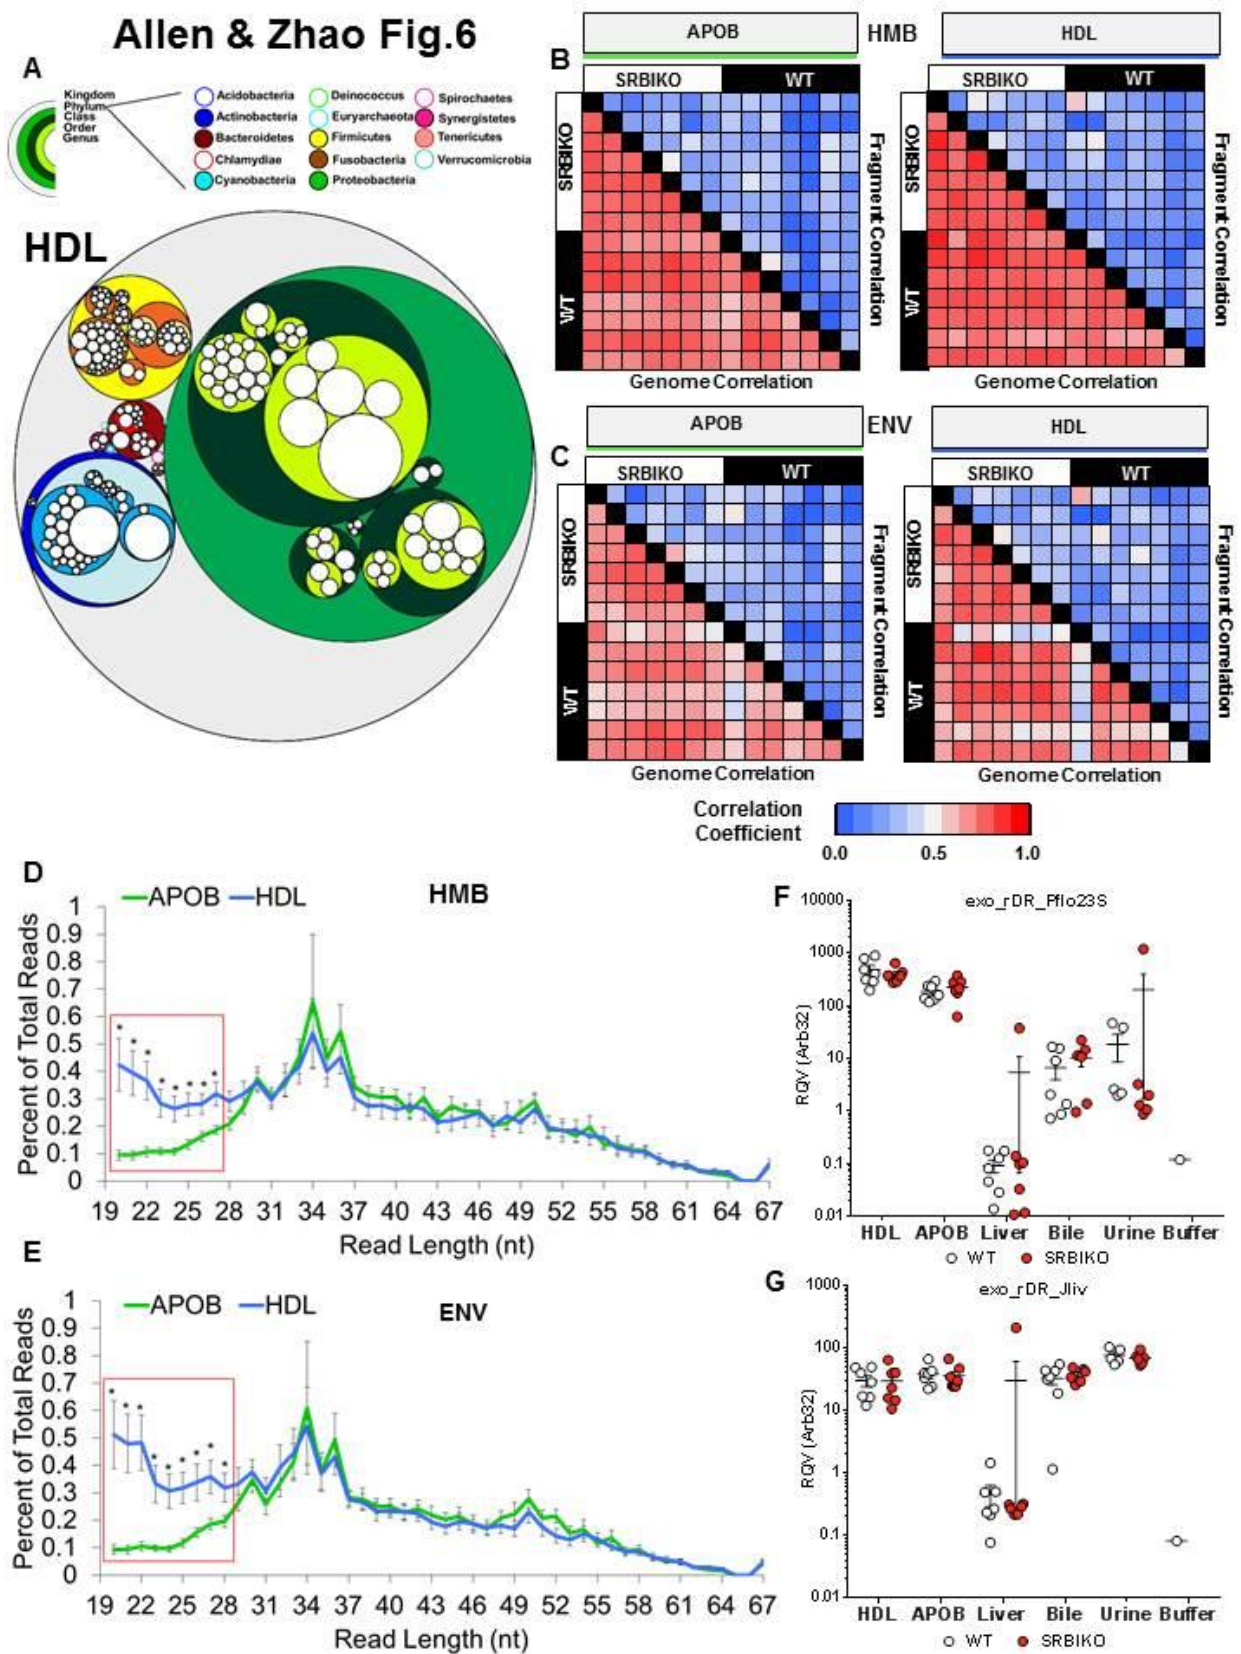

962 **Figure 6. Lipoproteins are enriched for sRNAs derived from proteobacteria in the microbiome**  
963 **and environment.** WT, wild-type mice; SR-BI KO, Scavenger receptor BI Knockout mice (*Scarb1*<sup>-/-</sup>).  
964 **(A)** Circular tree maps for non-host bacterial sRNAs on HDL from WT mice, as organized by taxonomy  
965 – proteobacteria, green; actinobacteria, blue; firmicutes, yellow; bacteroidetes, red. Diameter is  
966 proportional to the mean number of reads at the genome level (counts). **(B-C)** Heatmaps of correlation  
967 coefficients (Spearman, R) for non-host sRNAs (on HDL and APOB particles) for bacterial genomes  
968 and individual bacterial fragments across samples grouped by **(B)** human microbiome (HMB) and **(C)**  
969 environment (ENV) species. **(D-E)** Distribution of read lengths, as reported as percent of total reads, for  
970 non-host bacterial sRNAs grouped by **(D)** HMB and **(E)** ENV species. Two-tailed Student's t-tests.  
971 \* $p < 0.05$ . **(F-G)** Real-time PCR analysis of candidate non-host bacterial sRNAs for **(F)** exogenous rDR  
972 *Pseudomonas fluorescens* 23S (exo\_rDR\_Pflo23S) and **(G)** exogenous rDR *Janthinobacterium lividum*  
973 23S (exo\_rDR\_Jliv). WT, white circles; SR-BI KO, red circles. HDL WT, N=7; HDL SR-BI KO N=7;  
974 APOB WT, N=7, APOB SR-BI KO N=7; Liver WT, N=7; Liver SR-BI KO, N=7; Bile WT, N=7; Bile SR-BI  
975 KO, N=6; Urine WT, N=5; Urine SR-BI KO, N=6.

976

977

978

979

980

981

982

983



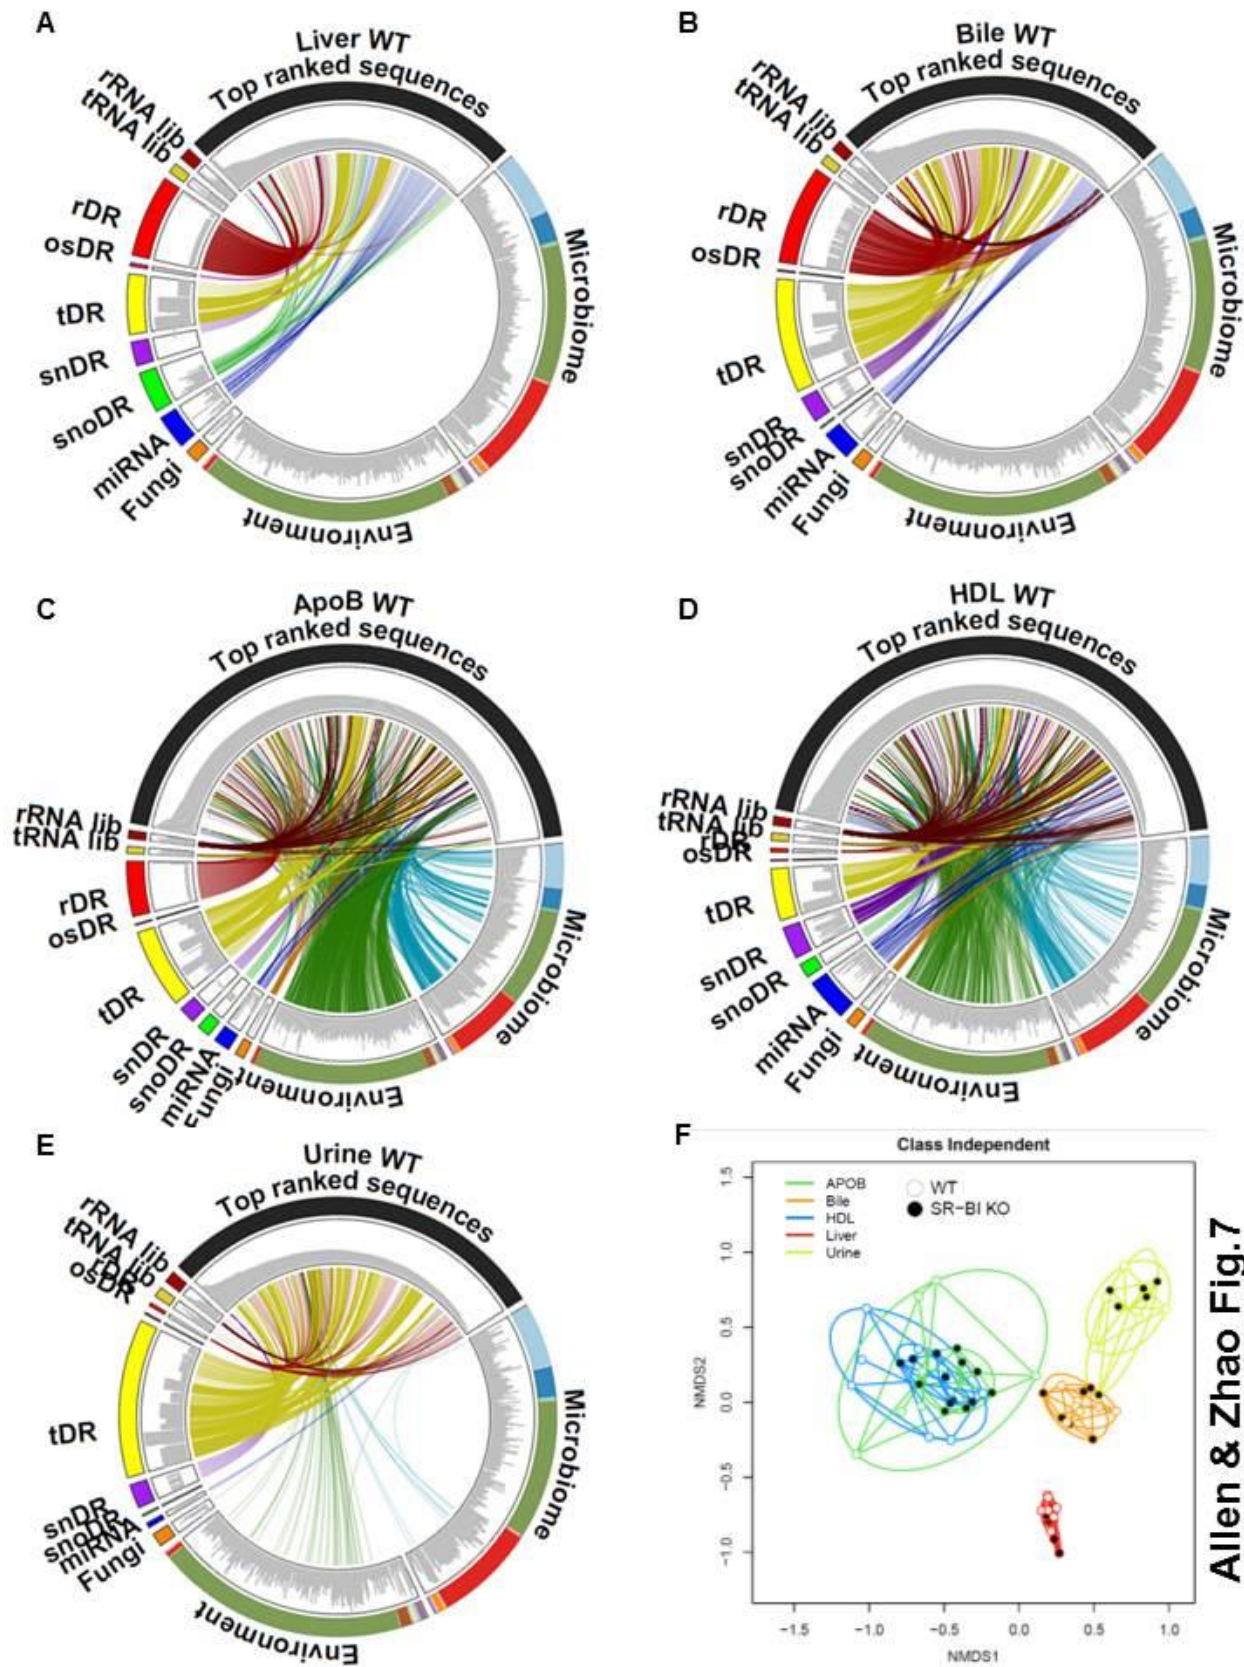

Allen & Zhao Fig.7

985 **Figure 7. The most abundant sRNAs on lipoproteins are bacterial rDRs. (A-E)** Circos plots linking  
986 the most abundant (top 100) sequences to assigned groups for non-host libraries (rRNA lib, tRNA lib),  
987 host sRNAs (rDR, osRNA, tDRs, snDRs, snoDRs, miRNAs) and non-host genomes (fungi,  
988 environment, and microbiome) for **(A)** liver, **(B)** bile, **(C)** APOB, **(D)** HDL, and **(E)** urine. **(F)** Principal  
989 Coordinate Analysis (PCoA) of sRNA profiles based on class-independent analyses. Wild-type mice,  
990 WT (open circles); Scavenger receptor BI Knockout mice (*Scarb1*<sup>-/-</sup>), SR-BI KO (filled circles). HDL WT,  
991 N=7; HDL SR-BI KO N=7; APOB WT, N=7, APOB SR-BI KO N=7; Liver WT, N=7; Liver SR-BI KO,  
992 N=7; Bile WT, N=7; Bile SR-BI KO, N=6; Urine WT, N=5; Urine SR-BI KO, N=6.

993

994

995

996

997

998

999

1000

1001

1002

1003

1004

1005

1006

1007

1008

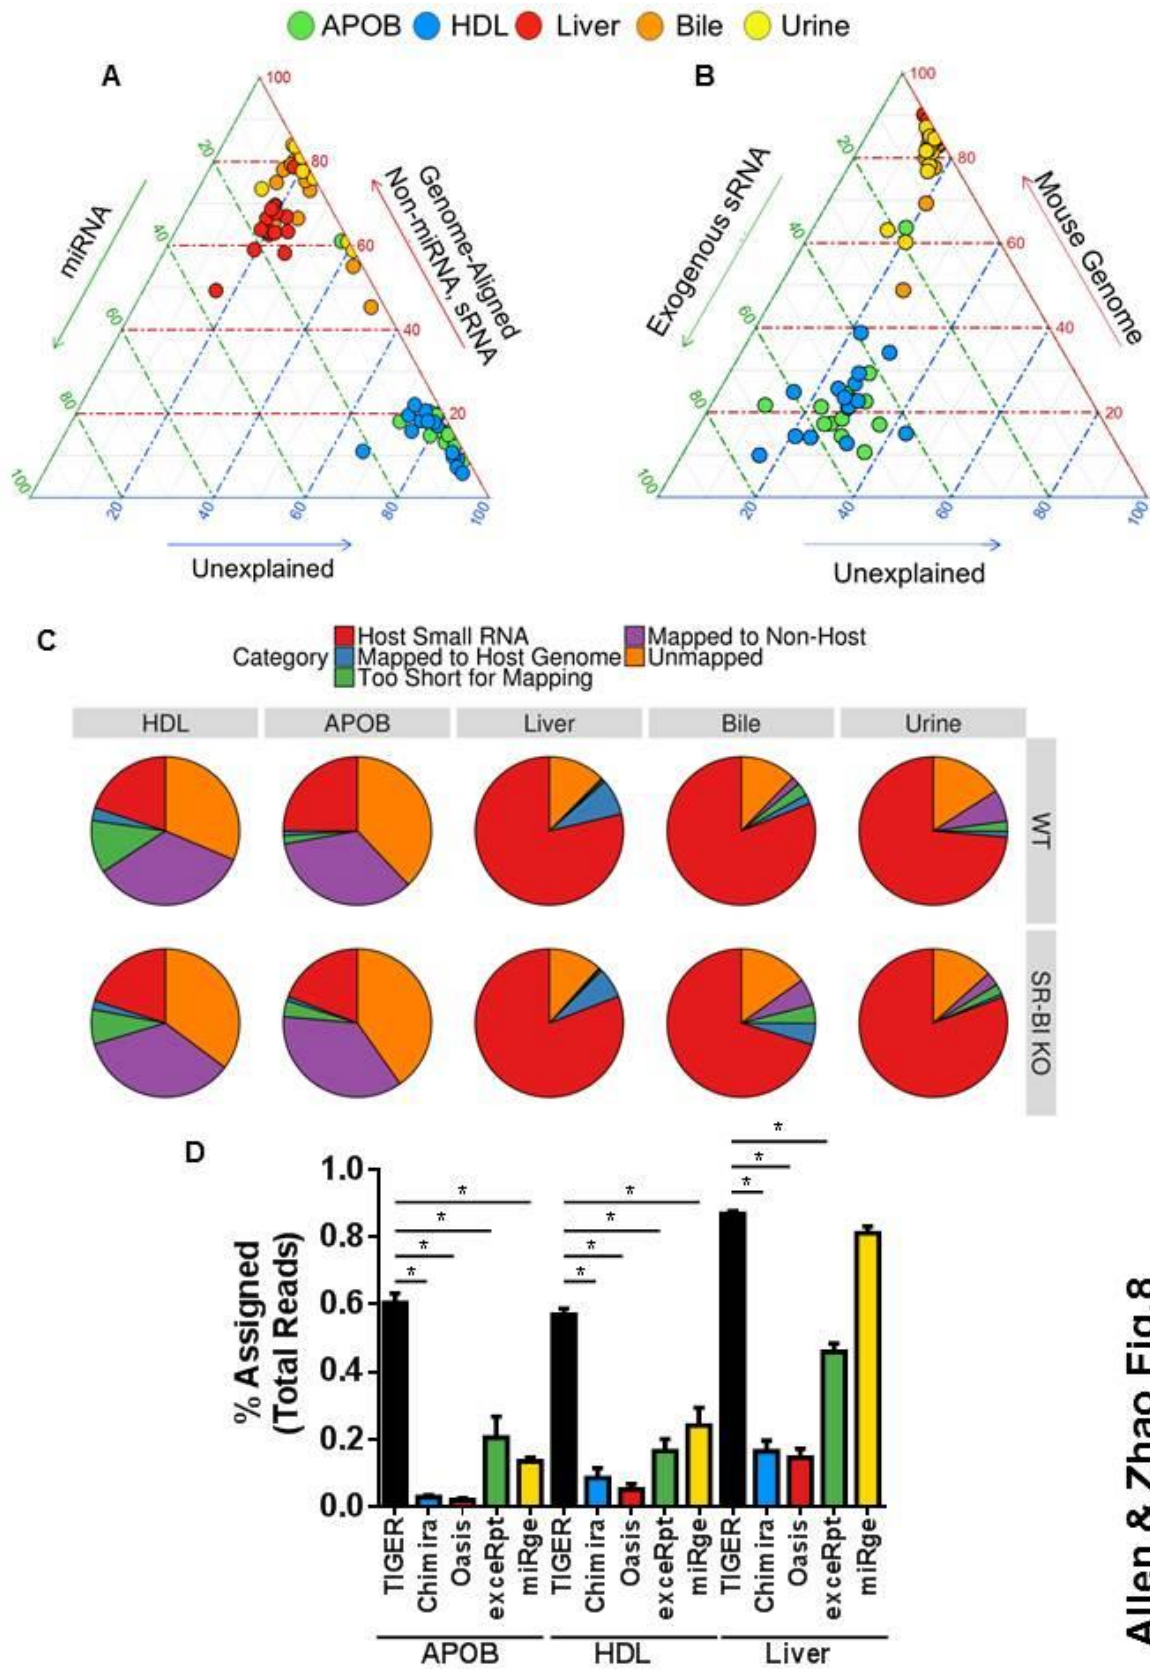

Allen & Zhao Fig.8

1010 **Figure 8. TIGER analysis pipeline accounts for significantly more reads than other software for**  
1011 **lipoprotein sRNA-seq data. (A-B)** Ternary plots of sRNA profiles for all samples displayed as **(A)**  
1012 percent unexplained (blue), miRNAs (green), and non-miRNA host sRNAs (red); **(B)** percent  
1013 unexplained (blue), exogenous sRNAs (green), and host genome (red). WT, wild-type mice; SR-BI KO,  
1014 Scavenger receptor BI Knockout mice (*Scarb1*<sup>-/-</sup>). **(C)** Pie charts illustrating the mean fraction of reads  
1015 assigned to host sRNA (red), host genome (blue), non-host (purple), too short for mapping (green), and  
1016 unmapped (orange). HDL WT, N=7; HDL SR-BI KO N=7; APOB WT, N=7, APOB SR-BI KO N=7; Liver  
1017 WT, N=7; Liver SR-BI KO, N=7; Bile WT, N=7; Bile SR-BI KO, N=6; Urine WT, N=5; Urine SR-BI KO,  
1018 N=6. **(D)** Comparisons of sRNA-seq data analysis pipelines, as reported as percent assigned per total  
1019 reads for TIGER (black), Chimira (blue), Oasis (red), ExceRpt (green), and miRge (yellow) for HDL,  
1020 APOB, and liver samples from WT mice. HDL WT, N=7; APOB WT, N=7, Liver WT, N=7. Mann-  
1021 Whitney non-parametric tests. \*p<0.05.

1022

1023

1024

1025

1026

1027

1028

1029

1030

1031

1032

1033

1034

1035



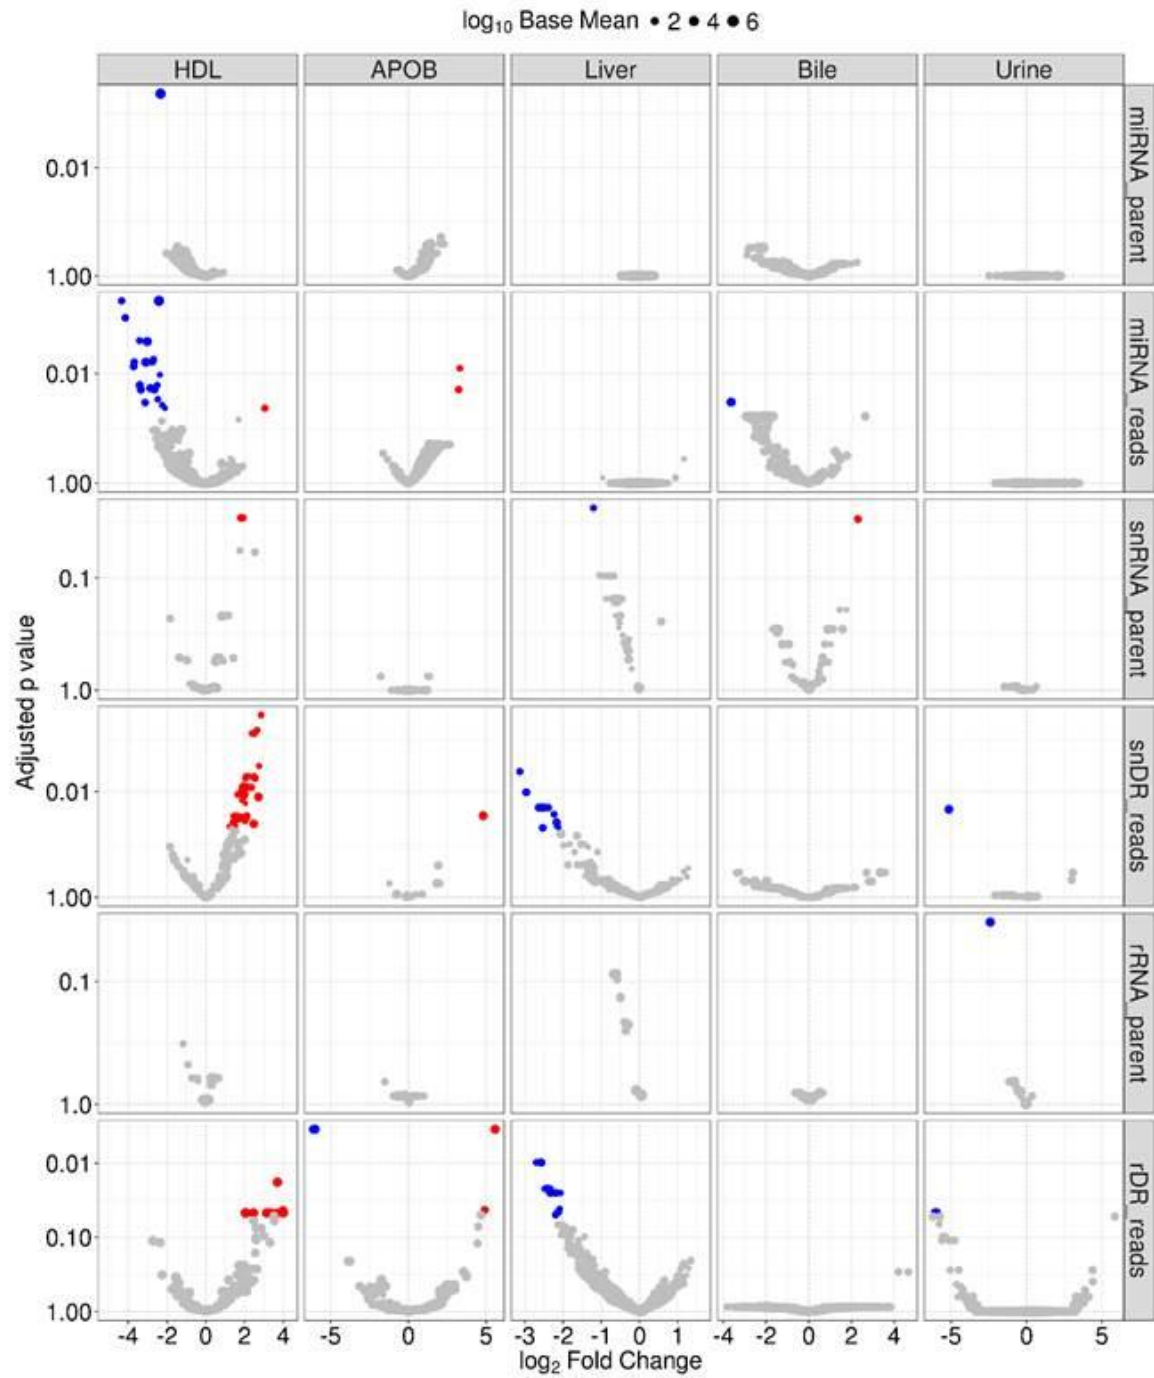

**Allen & Zhao Fig.9**

1037 **Figure 9. SR-BI regulates HDL-sRNAs at the individual fragment level, not parent level.**  
1038 Differential expression analysis by DEseq2. Volcano plots of demonstrating significant (adjusted  
1039  $p > 0.05$ ) differential ( $> 1.5$ -absolute fold change) abundances for miRNAs, snDRs, and rDRs at the  
1040 parent and individual fragment levels - red, increased; blue, decreased. HDL WT, N=7; HDL SR-BI KO  
1041 N=7; APOB WT, N=7, APOB SR-BI KO N=7; Liver WT, N=7; Liver SR-BI KO, N=7; Bile WT, N=7; Bile  
1042 SR-BI KO, N=6; Urine WT, N=5; Urine SR-BI KO, N=6.  
1043
